# Supplementary material for: Comparative Transcriptome Analysis Identifies Key Defense Genes and Mechanisms in Mulberry (Morus alba) Leaves against Silkworms (Bombyx mori)
Source: MDPI journal article supplement (doi:10.3390/ijms232113519), 2022-11-04
Supplement: s1 [file s1]

## Supplementary Figures

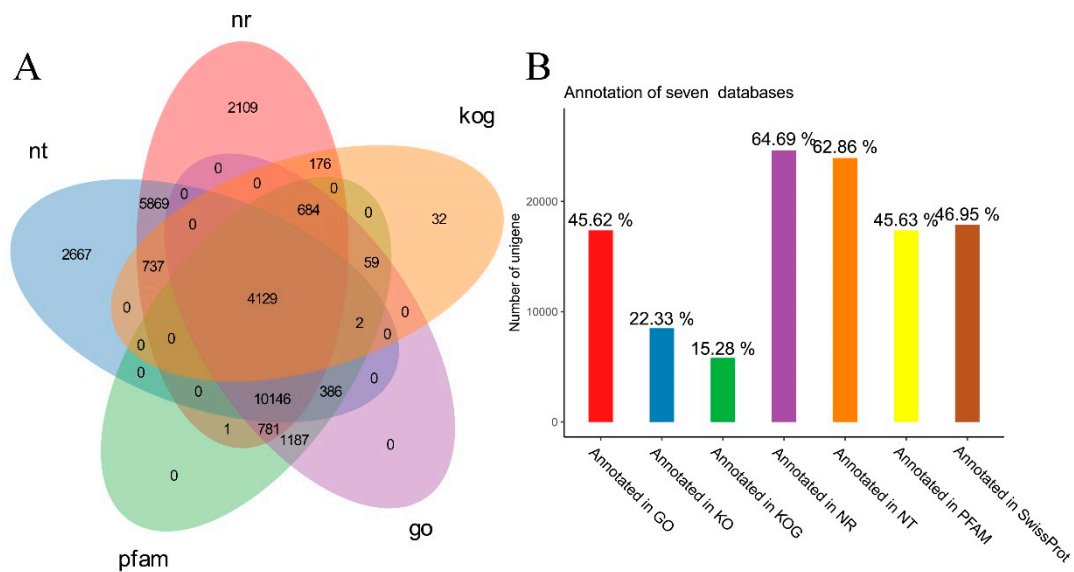

**Figure S1.** (A) Venn diagram of functional annotations of unigenes in nt (NCBI non-redundant protein sequences), nr (NCBI non-redundant protein sequences), kog (Clusters of Orthologous Groups of proteins), go (Gene Ontology) and pfam (Protein family) databases. (B) Heatmap of expression patterns in control and insect feeding samples.

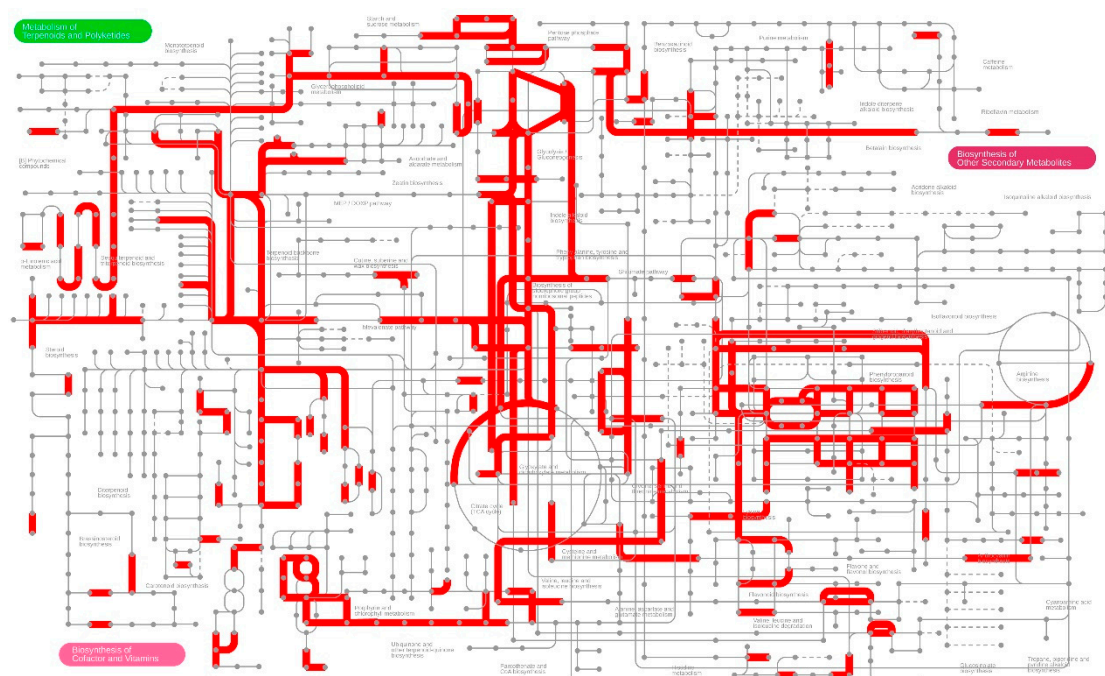

**Figure S2.** Secondary metabolite pathways enriched by up-regulated genes in mulberry after feeding by the silkworm 3 h. The map was generated with iPath (<http://pathways.embl.de>), a web-based tool for the visualization of metabolic pathways. The enriched pathways were marked by red lines ( $P_{\text{value}} < 0.05$ ). The most enriched pathways were "alpha-linolenic acid metabolism" (21 up-regulated genes), "phenylpropanoid biosynthesis" (25 up-regulated genes), followed by "sesquiterpenoid and triterpenoid biosynthesis" and "mevalonate pathway".

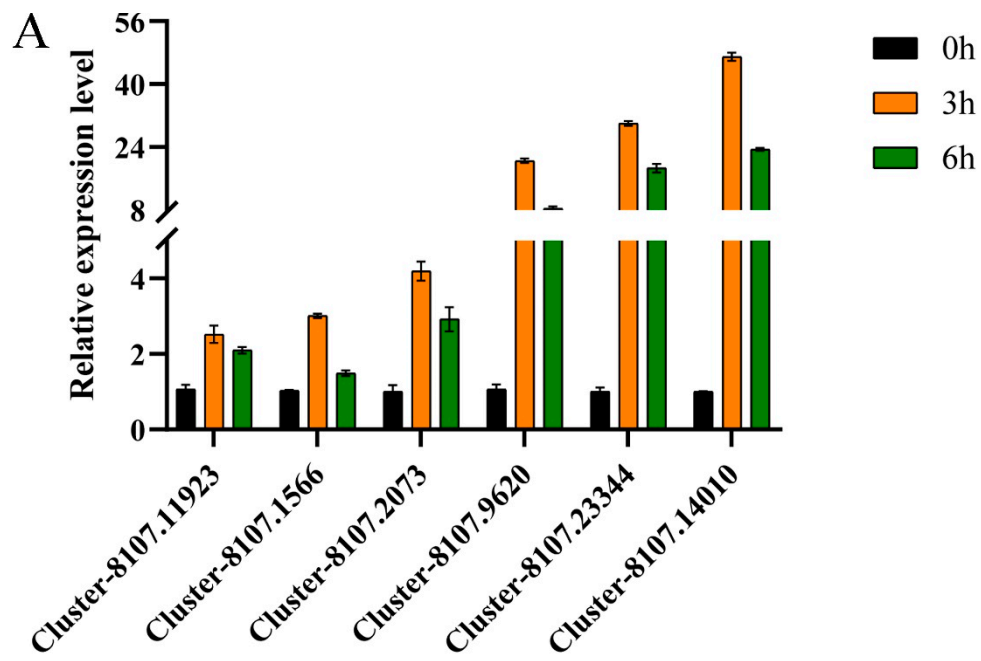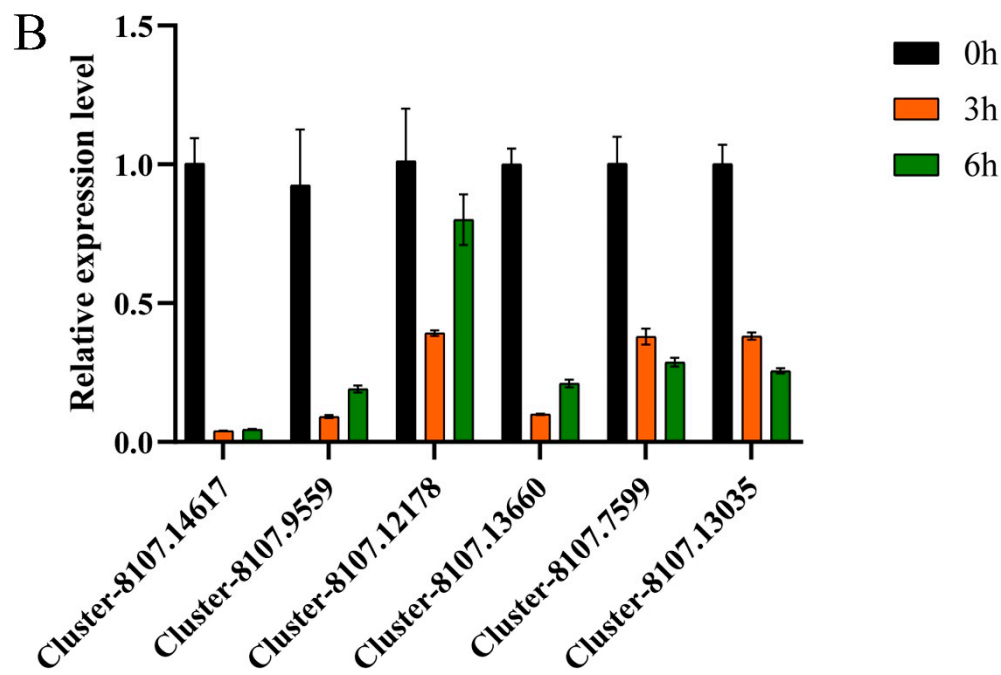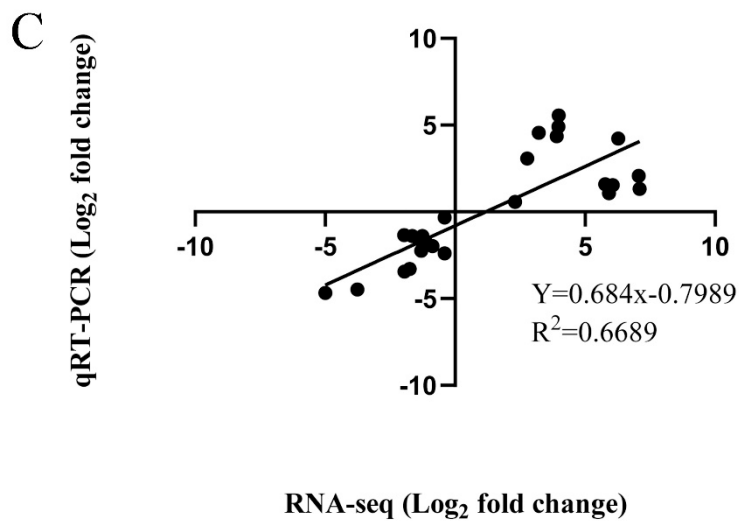

**Figure S3.** Validation of RNA-Seq data. Verification of the expression level of the selected eight DEGs from RNA-Seq data through RT-qPCR: (A) Six up-regulated genes (Cluster-8107.11923, Cluster-8107.1566, Cluster-8107.2073, Cluster-8107.9620, Cluster-8107.23344, Cluster-8107.14010). (B) Six down-regulated genes (Cluster-8107.14617, Cluster-8107.9559, Cluster-8107.12178, Cluster-8107.13660, Cluster-8107.7599, Cluster-8107.13035). Error bars indicate the standard error as mean + SD. The x axis represents the relative expression level, and the y-axis represents cultivars. (C) Correlation coefficient of gene expression between qRT-PCR analysis and RNA-Seq data.
