# Supplementary material for: Comparative Transcriptome Analysis Identifies Key Defense Genes and Mechanisms in Mulberry (Morus alba) Leaves against Silkworms (Bombyx mori)
Source: Int J Mol Sci. 2022 Nov 4;23(21):13519. doi: 10.3390/ijms232113519 (PMC9656888; doi:10.3390/ijms232113519)
Supplement: Supplementary file 1 [file ijms-23-13519-s001.zip › Table S1.xlsx]

## Sheet: Sheet1
Table S1. Mapping of reads obtained from Morus alba leaves in de novo assembly transcripts
Samples	Total reads	Total mapped	Ratio of mapped reads
CK_1	43853846	35080766	0.7999
CK_2	46219430	37316290	0.8074
CK_3	44863508	36064820	0.8039
EL_3h_1	44999176	35756998	0.7946
EL_3h_2	43529180	34226734	0.7863
EL_3h_3	40747346	32441926	0.7962
EL_6h_1	45024018	35857434	0.7964
EL_6h_2	45247482	36219752	0.8005
EL_6h_3	44195894	34940938	0.7906
