# Supplementary material for: Comparative Transcriptome Analysis Identifies Key Defense Genes and Mechanisms in Mulberry (Morus alba) Leaves against Silkworms (Bombyx mori)
Source: Int J Mol Sci. 2022 Nov 4;23(21):13519. doi: 10.3390/ijms232113519 (PMC9656888; doi:10.3390/ijms232113519)
Supplement: Supplementary file 1 [file ijms-23-13519-s001.zip › Table S2.xlsx]

## Sheet: EL_3h v CK Up
GO ID	GO term	Annotated gene number	Enriched gene number	P value
GO:0009611	response to wounding	274	67	9.7e-17
GO:0010597	green leaf volatile biosynthetic process	10	10	5.8e-12
GO:0080027	response to herbivore	21	14	1.3e-11
GO:0009695	jasmonic acid biosynthetic process	65	24	1.8e-11
GO:0009753	response to jasmonic acid	211	50	5.6e-10
GO:0031408	oxylipin biosynthetic process	40	17	1.2e-09
GO:0045489	pectin biosynthetic process	49	17	1.3e-07
GO:0009809	lignin biosynthetic process	79	19	3.2e-07
GO:0009620	response to fungus	401	60	4.9e-07
GO:0034440	lipid oxidation	88	16	9.3e-07
GO:2000022	regulation of jasmonic acid mediated signaling pathway	31	12	1.2e-06
GO:0043693	monoterpene biosynthetic process	7	6	1.2e-06
GO:0016127	sterol catabolic process	5	5	2.4e-06
GO:0034434	sterol esterification	5	5	2.4e-06
GO:0009617	response to bacterium	1105	81	6.6e-06
GO:0002213	defense response to insect	24	12	7.5e-06
GO:0030244	cellulose biosynthetic process	63	18	7.5e-06
GO:0009834	plant-type secondary cell wall biogenesis	73	19	1.2e-05
GO:0019287	isopentenyl diphosphate biosynthetic process, mevalonate pathway	9	6	1.3e-05
GO:0006486	protein glycosylation	137	25	1.8e-05
GO:0055085	transmembrane transport	787	90	2.2e-05
GO:0009073	aromatic amino acid family biosynthetic process	47	11	5.1e-05
GO:0006952	defense response	1606	139	5.2e-05
GO:0080167	response to karrikin	125	23	5.4e-05
GO:0016106	sesquiterpenoid biosynthetic process	32	9	6e-05
GO:0006636	unsaturated fatty acid biosynthetic process	21	8	8.5e-05
GO:0051762	sesquiterpene biosynthetic process	8	5	0.00011
GO:0009751	response to salicylic acid	146	24	0.00013
GO:0009414	response to water deprivation	387	48	0.00017
GO:0010088	phloem development	25	9	0.00018
GO:0009423	chorismate biosynthetic process	9	5	0.00024
GO:0009969	xyloglucan biosynthetic process	14	6	0.00032
GO:0009833	plant-type primary cell wall biogenesis	25	8	0.00035
GO:0045337	farnesyl diphosphate biosynthetic process	6	4	0.00043
GO:0033231	carbohydrate export	3	3	0.00043
GO:1902334	fructose export from vacuole to cytoplasm	3	3	0.00043
GO:0033384	geranyl diphosphate biosynthetic process	3	3	0.00043
GO:0009800	cinnamic acid biosynthetic process	10	5	0.00044
GO:0050832	defense response to fungus	306	37	0.00055
GO:0016114	terpenoid biosynthetic process	148	28	0.00071
GO:0019373	epoxygenase P450 pathway	7	4	0.00094
GO:0009694	jasmonic acid metabolic process	77	29	0.00114
GO:0009866	induced systemic resistance, ethylene mediated signaling pathway	8	4	0.00176
GO:0016192	vesicle-mediated transport	401	37	0.00191
GO:0090351	seedling development	224	22	0.00196
GO:0010192	mucilage biosynthetic process	27	6	0.00297
GO:0034976	response to endoplasmic reticulum stress	113	15	0.00314
GO:0046244	salicylic acid catabolic process	5	3	0.00381
GO:0006891	intra-Golgi vesicle-mediated transport	36	8	0.00461
GO:0010374	stomatal complex development	62	8	0.00467
GO:0010067	procambium histogenesis	10	4	0.00467
GO:0006722	triterpenoid metabolic process	15	5	0.00566
GO:0010373	negative regulation of gibberellin biosynthetic process	2	2	0.00568
GO:0042425	choline biosynthetic process	2	2	0.00568
GO:0033386	geranylgeranyl diphosphate biosynthetic process	2	2	0.00568
GO:0033389	putrescine biosynthetic process from arginine, using agmatinase	2	2	0.00568
GO:1902039	negative regulation of seed dormancy process	2	2	0.00568
GO:0019305	dTDP-rhamnose biosynthetic process	2	2	0.00568
GO:0016125	sterol metabolic process	72	17	0.00632
GO:0009832	plant-type cell wall biogenesis	158	40	0.00685
GO:0015780	nucleotide-sugar transport	23	7	0.00715
GO:0048838	release of seed from dormancy	6	3	0.00719
GO:0009805	coumarin biosynthetic process	6	3	0.00719
GO:0009813	flavonoid biosynthetic process	93	17	0.00735
GO:0010200	response to chitin	117	16	0.01022
GO:0046294	formaldehyde catabolic process	7	3	0.01189
GO:0010215	cellulose microfibril organization	13	4	0.01325
GO:0019432	triglyceride biosynthetic process	27	6	0.01361
GO:0009789	positive regulation of abscisic acid-activated signaling pathway	43	8	0.01385
GO:0051560	mitochondrial calcium ion homeostasis	3	2	0.01619
GO:0010253	UDP-rhamnose biosynthetic process	3	2	0.01619
GO:0010289	homogalacturonan biosynthetic process	3	2	0.01619
GO:1990059	fruit valve development	3	2	0.01619
GO:0015714	phosphoenolpyruvate transport	3	2	0.01619
GO:0015840	urea transport	3	2	0.01619
GO:0046177	D-gluconate catabolic process	3	2	0.01619
GO:1900366	negative regulation of defense response to insect	3	2	0.01619
GO:0036444	calcium ion transmembrane import into mitochondrion	3	2	0.01619
GO:0080173	male-female gamete recognition during double fertilization	3	2	0.01619
GO:0006065	UDP-glucuronate biosynthetic process	3	2	0.01619
GO:0072334	UDP-galactose transmembrane transport	3	2	0.01619
GO:0032259	methylation	241	10	0.01729
GO:0009901	anther dehiscence	14	4	0.01746
GO:0009691	cytokinin biosynthetic process	14	4	0.01746
GO:0055114	oxidation-reduction process	727	67	0.0175
GO:0048759	xylem vessel member cell differentiation	8	3	0.01796
GO:0033540	fatty acid beta-oxidation using acyl-CoA oxidase	8	3	0.01796
GO:0009266	response to temperature stimulus	677	42	0.0185
GO:0006559	L-phenylalanine catabolic process	15	4	0.02242
GO:0006833	water transport	30	6	0.02252
GO:0052324	plant-type cell wall cellulose biosynthetic process	16	5	0.02538
GO:0010015	root morphogenesis	260	30	0.0254
GO:0018401	peptidyl-proline hydroxylation to 4-hydroxy-L-proline	9	3	0.02545
GO:0006564	L-serine biosynthetic process	9	3	0.02545
GO:0006886	intracellular protein transport	480	35	0.02585
GO:0071215	cellular response to abscisic acid stimulus	218	27	0.02763
GO:0000038	very long-chain fatty acid metabolic process	35	6	0.02811
GO:0019853	L-ascorbic acid biosynthetic process	16	4	0.02815
GO:0080092	regulation of pollen tube growth	16	4	0.02815
GO:0009828	plant-type cell wall loosening	16	4	0.02815
GO:0006888	ER to Golgi vesicle-mediated transport	81	10	0.02876
GO:0006890	retrograde vesicle-mediated transport, Golgi to ER	32	6	0.03025
GO:0055074	calcium ion homeostasis	62	8	0.03069
GO:0010412	mannan metabolic process	4	2	0.03076
GO:0035434	copper ion transmembrane transport	4	2	0.03076
GO:0046901	tetrahydrofolylpolyglutamate biosynthetic process	4	2	0.03076
GO:0098712	L-glutamate import across plasma membrane	4	2	0.03076
GO:0006024	glycosaminoglycan biosynthetic process	4	2	0.03076
GO:1901747	prephenate(2-) biosynthetic process	4	2	0.03076
GO:0015689	molybdate ion transport	4	2	0.03076
GO:0045490	pectin catabolic process	41	7	0.03201
GO:0043069	negative regulation of programmed cell death	25	5	0.0343
GO:0006730	one-carbon metabolic process	25	5	0.0343
GO:0009871	jasmonic acid and ethylene-dependent systemic resistance, ethylene mediated signaling pathway	17	4	0.03467
GO:0009116	nucleoside metabolic process	321	26	0.03475
GO:0072657	protein localization to membrane	126	8	0.03504
GO:0006629	lipid metabolic process	878	118	0.03583
GO:0005975	carbohydrate metabolic process	905	136	0.03876
GO:0006810	transport	2028	201	0.04019
GO:0071456	cellular response to hypoxia	202	23	0.04117
GO:0005985	sucrose metabolic process	44	6	0.042
GO:0001676	long-chain fatty acid metabolic process	27	9	0.04423
GO:0010089	xylem development	43	9	0.04445
GO:0009963	positive regulation of flavonoid biosynthetic process	13	4	0.04458
GO:0006355	regulation of transcription, DNA-templated	1463	116	0.04471
GO:0009627	systemic acquired resistance	60	8	0.04477
GO:0010252	auxin homeostasis	44	7	0.04495
GO:0033356	UDP-L-arabinose metabolic process	8	3	0.04868
GO:0010321	regulation of vegetative phase change	5	2	0.04873
GO:0000050	urea cycle	5	2	0.04873
GO:0034635	glutathione transport	5	2	0.04873
GO:0010230	alternative respiration	5	2	0.04873
GO:0071485	cellular response to absence of light	5	2	0.04873
GO:1901959	positive regulation of cutin biosynthetic process	5	2	0.04873
GO:0090156	cellular sphingolipid homeostasis	5	2	0.04873
GO:0080148	negative regulation of response to water deprivation	5	2	0.04873
GO:0046777	protein autophosphorylation	223	24	0.04933
GO:0045492	xylan biosynthetic process	32	6	0.05

## Sheet: EL_3h v CK Down
GO ID	GO term	Annotated gene number	Enriched gene number	P value
GO:0009658	chloroplast organization	242	45	3.2e-12
GO:0015995	chlorophyll biosynthetic process	66	19	4.8e-11
GO:0009768	photosynthesis, light harvesting in photosystem I	27	13	1.3e-10
GO:0009409	response to cold	454	50	1.5e-09
GO:0006355	regulation of transcription, DNA-templated	1463	102	3e-07
GO:0019252	starch biosynthetic process	39	11	3.3e-06
GO:0055114	oxidation-reduction process	727	74	3.5e-06
GO:0009645	response to low light intensity stimulus	17	9	5.9e-06
GO:0009644	response to high light intensity	74	16	1.2e-05
GO:0009773	photosynthetic electron transport in photosystem I	18	7	1.6e-05
GO:0016584	nucleosome positioning	9	5	3.5e-05
GO:0007623	circadian rhythm	148	22	4e-05
GO:0010207	photosystem II assembly	32	10	5.1e-05
GO:0006094	gluconeogenesis	45	10	6.5e-05
GO:0009416	response to light stimulus	812	88	6.5e-05
GO:0042793	transcription from plastid promoter	11	6	6.6e-05
GO:0005986	sucrose biosynthetic process	16	6	8.4e-05
GO:0045038	protein import into chloroplast thylakoid membrane	6	4	8.9e-05
GO:0010239	chloroplast mRNA processing	11	5	0.00012
GO:0019253	reductive pentose-phosphate cycle	25	7	0.00018
GO:0031936	negative regulation of chromatin silencing	12	5	0.00019
GO:0010304	PSII associated light-harvesting complex II catabolic process	7	4	0.0002
GO:0010422	regulation of brassinosteroid biosynthetic process	8	4	0.00038
GO:0030388	fructose 1,6-bisphosphate metabolic process	21	6	0.00046
GO:0010196	nonphotochemical quenching	22	6	0.00061
GO:0071281	cellular response to iron ion	9	4	0.00066
GO:0005978	glycogen biosynthetic process	9	4	0.00066
GO:0045910	negative regulation of DNA recombination	21	6	0.00089
GO:0016036	cellular response to phosphate starvation	73	11	0.00103
GO:0009643	photosynthetic acclimation	10	4	0.00106
GO:0010027	thylakoid membrane organization	63	10	0.00115
GO:0048564	photosystem I assembly	17	5	0.00121
GO:0045454	cell redox homeostasis	87	12	0.00138
GO:0098542	defense response to other organism	1354	42	0.00143
GO:0009970	cellular response to sulfate starvation	11	4	0.0016
GO:1901259	chloroplast rRNA processing	19	5	0.00209
GO:0010244	response to low fluence blue light stimulus by blue low-fluence system	6	3	0.00229
GO:0019375	galactolipid biosynthetic process	12	4	0.00231
GO:0071586	CAAX-box protein processing	12	4	0.00231
GO:0080058	protein deglutathionylation	2	2	0.00255
GO:0009662	etioplast organization	2	2	0.00255
GO:0071629	cytoplasm-associated proteasomal ubiquitin-dependent protein catabolic process	2	2	0.00255
GO:0071456	cellular response to hypoxia	202	20	0.00315
GO:0006000	fructose metabolic process	13	4	0.0032
GO:0010029	regulation of seed germination	95	13	0.00347
GO:0009648	photoperiodism	140	15	0.00379
GO:0008219	cell death	246	19	0.00472
GO:0009704	de-etiolation	15	4	0.00564
GO:0005992	trehalose biosynthetic process	15	4	0.00564
GO:0010021	amylopectin biosynthetic process	8	3	0.00594
GO:0019464	glycine decarboxylation via glycine cleavage system	8	3	0.00594
GO:0009902	chloroplast relocation	19	5	0.00735
GO:0010617	circadian regulation of calcium ion oscillation	3	2	0.00739
GO:0071836	nectar secretion	3	2	0.00739
GO:0006565	L-serine catabolic process	9	3	0.00857
GO:0009769	photosynthesis, light harvesting in photosystem II	9	3	0.00857
GO:0070413	trehalose metabolism in response to stress	9	3	0.00857
GO:0010190	cytochrome b6f complex assembly	9	3	0.00857
GO:0019264	glycine biosynthetic process from serine	9	3	0.00857
GO:0010161	red light signaling pathway	9	3	0.00857
GO:0009767	photosynthetic electron transport chain	62	16	0.00872
GO:0009646	response to absence of light	47	7	0.0088
GO:0006002	fructose 6-phosphate metabolic process	17	4	0.00907
GO:0009739	response to gibberellin	106	14	0.00963
GO:0009637	response to blue light	81	11	0.01111
GO:0018026	peptidyl-lysine monomethylation	10	3	0.01179
GO:0042908	xenobiotic transport	4	2	0.01428
GO:0010376	stomatal complex formation	4	2	0.01428
GO:1903862	positive regulation of oxidative phosphorylation	4	2	0.01428
GO:0010270	photosystem II oxygen evolving complex assembly	4	2	0.01428
GO:0071482	cellular response to light stimulus	111	12	0.01542
GO:0009649	entrainment of circadian clock	16	5	0.01553
GO:0046655	folic acid metabolic process	11	3	0.01562
GO:0010019	chloroplast-nucleus signaling pathway	11	3	0.01562
GO:0045493	xylan catabolic process	11	3	0.01562
GO:0080163	regulation of protein serine/threonine phosphatase activity	11	3	0.01562
GO:0010206	photosystem II repair	11	3	0.01562
GO:0030261	chromosome condensation	30	5	0.01617
GO:0031425	chloroplast RNA processing	32	9	0.01911
GO:0043085	positive regulation of catalytic activity	104	9	0.01938
GO:0000160	phosphorelay signal transduction system	109	8	0.01948
GO:0009735	response to cytokinin	91	11	0.01989
GO:0006995	cellular response to nitrogen starvation	32	5	0.02104
GO:1902347	response to strigolactone	6	3	0.02296
GO:0043153	entrainment of circadian clock by photoperiod	5	2	0.02301
GO:0033542	fatty acid beta-oxidation, unsaturated, even number	5	2	0.02301
GO:0010218	response to far red light	45	6	0.02474
GO:0016121	carotene catabolic process	13	3	0.02511
GO:0009638	phototropism	23	4	0.02657
GO:0006334	nucleosome assembly	34	5	0.02678
GO:0009737	response to abscisic acid	549	38	0.0271
GO:0009772	photosynthetic electron transport in photosystem II	14	3	0.03078
GO:0006808	regulation of nitrogen utilization	6	2	0.03336
GO:0009228	thiamine biosynthetic process	6	2	0.03336
GO:0080037	negative regulation of cytokinin-activated signaling pathway	6	2	0.03336
GO:0009061	anaerobic respiration	6	2	0.03336
GO:0010343	singlet oxygen-mediated programmed cell death	6	2	0.03336
GO:2000028	regulation of photoperiodism, flowering	61	6	0.03346
GO:0010114	response to red light	59	9	0.03548
GO:0080036	regulation of cytokinin-activated signaling pathway	21	5	0.03688
GO:0035999	tetrahydrofolate interconversion	15	3	0.03706
GO:0010205	photoinhibition	15	3	0.03706
GO:0015979	photosynthesis	227	57	0.03747
GO:0009740	gibberellic acid mediated signaling pathway	51	7	0.0396
GO:0009903	chloroplast avoidance movement	16	3	0.04395
GO:0006400	tRNA modification	76	9	0.04457
GO:0016120	carotene biosynthetic process	8	3	0.04508
GO:0016123	xanthophyll biosynthetic process	7	2	0.04517
GO:0031222	arabinan catabolic process	7	2	0.04517
GO:0032790	ribosome disassembly	7	2	0.04517
GO:0072318	clathrin coat disassembly	7	2	0.04517

## Sheet: EL_6h v CK Up
Table S2. The biological processes (BP) terms enriched by the differently expressed genes (DEGs).
GO ID	GO term	Annotated gene number	Enriched gene number	P value
GO:0080027	response to herbivore	21	13	9.6e-13
GO:0009611	response to wounding	274	47	7e-12
GO:0010597	green leaf volatile biosynthetic process	10	9	1.3e-11
GO:0009617	response to bacterium	1105	53	9.1e-09
GO:0009753	response to jasmonic acid	211	33	1.5e-08
GO:0009695	jasmonic acid biosynthetic process	65	16	5e-08
GO:0016127	sterol catabolic process	5	5	2.5e-07
GO:0034434	sterol esterification	5	5	2.5e-07
GO:0055114	oxidation-reduction process	727	60	6.7e-07
GO:0019287	isopentenyl diphosphate biosynthetic process, mevalonate pathway	9	6	9e-07
GO:0016106	sesquiterpenoid biosynthetic process	32	9	4.5e-06
GO:0006486	protein glycosylation	137	17	4.6e-06
GO:0043693	monoterpene biosynthetic process	7	5	4.9e-06
GO:2000022	regulation of jasmonic acid mediated signaling pathway	31	9	1e-05
GO:0051762	sesquiterpene biosynthetic process	8	5	1.3e-05
GO:0031408	oxylipin biosynthetic process	40	10	1.4e-05
GO:0009969	xyloglucan biosynthetic process	14	6	2.6e-05
GO:0009414	response to water deprivation	387	37	3.1e-05
GO:0055085	transmembrane transport	787	57	7.1e-05
GO:0045489	pectin biosynthetic process	49	11	8e-05
GO:0009620	response to fungus	401	40	9.3e-05
GO:0009751	response to salicylic acid	146	17	0.00011
GO:0009866	induced systemic resistance, ethylene mediated signaling pathway	8	4	0.00032
GO:0034440	lipid oxidation	88	11	0.00035
GO:0009834	plant-type secondary cell wall biogenesis	73	13	0.00055
GO:0010192	mucilage biosynthetic process	27	6	0.00055
GO:0009423	chorismate biosynthetic process	9	4	0.00055
GO:0009809	lignin biosynthetic process	79	12	0.0006
GO:0080092	regulation of pollen tube growth	16	5	0.00071
GO:0030244	cellulose biosynthetic process	63	13	0.00074
GO:0010374	stomatal complex development	62	7	0.00088
GO:0009871	jasmonic acid and ethylene-dependent systemic resistance, ethylene mediated signaling pathway	17	5	0.00097
GO:0009625	response to insect	43	11	0.00164
GO:0009739	response to gibberellin	106	13	0.00186
GO:0016125	sterol metabolic process	72	15	0.0019
GO:0010373	negative regulation of gibberellin biosynthetic process	2	2	0.00231
GO:1902039	negative regulation of seed dormancy process	2	2	0.00231
GO:0019305	dTDP-rhamnose biosynthetic process	2	2	0.00231
GO:1903942	positive regulation of respiratory gaseous exchange	2	2	0.00231
GO:0007263	nitric oxide mediated signal transduction	2	2	0.00231
GO:0033389	putrescine biosynthetic process from arginine, using agmatinase	2	2	0.00231
GO:0006949	syncytium formation	13	4	0.00268
GO:0010215	cellulose microfibril organization	13	4	0.00268
GO:0006636	unsaturated fatty acid biosynthetic process	21	5	0.00272
GO:0050832	defense response to fungus	306	25	0.00303
GO:0019373	epoxygenase P450 pathway	7	3	0.00335
GO:0006952	defense response	1606	84	0.00405
GO:0071456	cellular response to hypoxia	202	19	0.0041
GO:0048759	xylem vessel member cell differentiation	8	3	0.00518
GO:0002213	defense response to insect	24	6	0.00604
GO:0009833	plant-type primary cell wall biogenesis	25	5	0.00605
GO:0009828	plant-type cell wall loosening	16	4	0.00608
GO:0045337	farnesyl diphosphate biosynthetic process	6	3	0.0067
GO:0043620	regulation of DNA-templated transcription in response to stress	7	3	0.0067
GO:0015714	phosphoenolpyruvate transport	3	2	0.00671
GO:0015840	urea transport	3	2	0.00671
GO:0033231	carbohydrate export	3	2	0.00671
GO:0010253	UDP-rhamnose biosynthetic process	3	2	0.00671
GO:1902334	fructose export from vacuole to cytoplasm	3	2	0.00671
GO:0010055	atrichoblast differentiation	3	2	0.00671
GO:0033384	geranyl diphosphate biosynthetic process	3	2	0.00671
GO:0052324	plant-type cell wall cellulose biosynthetic process	16	5	0.00745
GO:0051262	protein tetramerization	13	4	0.00747
GO:0051512	positive regulation of unidimensional cell growth	9	3	0.00749
GO:0045893	positive regulation of transcription, DNA-templated	337	21	0.00793
GO:0019432	triglyceride biosynthetic process	27	5	0.0085
GO:0042545	cell wall modification	101	14	0.00874
GO:0006629	lipid metabolic process	878	98	0.00918
GO:0016998	cell wall macromolecule catabolic process	18	4	0.00947
GO:0005975	carbohydrate metabolic process	905	90	0.00985
GO:0009664	plant-type cell wall organization	99	20	0.00988
GO:0009116	nucleoside metabolic process	321	18	0.01158
GO:0016114	terpenoid biosynthetic process	148	30	0.01159
GO:0010412	mannan metabolic process	4	2	0.013
GO:0006833	water transport	30	5	0.01332
GO:0009624	response to nematode	79	9	0.01337
GO:0009963	positive regulation of flavonoid biosynthetic process	13	4	0.01365
GO:0009939	positive regulation of gibberellic acid mediated signaling pathway	12	3	0.01761
GO:0010252	auxin homeostasis	44	6	0.01804
GO:0048527	lateral root development	113	10	0.01992
GO:0046244	salicylic acid catabolic process	5	2	0.02097
GO:0006021	inositol biosynthetic process	5	2	0.02097
GO:0006015	5-phosphoribose 1-diphosphate biosynthetic process	5	2	0.02097
GO:0034635	glutathione transport	5	2	0.02097
GO:0000050	urea cycle	5	2	0.02097
GO:0080148	negative regulation of response to water deprivation	5	2	0.02097
GO:0090156	cellular sphingolipid homeostasis	5	2	0.02097
GO:1901959	positive regulation of cutin biosynthetic process	5	2	0.02097
GO:0051555	flavonol biosynthetic process	15	4	0.02202
GO:1901703	protein localization involved in auxin polar transport	13	3	0.02209
GO:0002229	defense response to oomycetes	60	7	0.02449
GO:0009808	lignin metabolic process	93	15	0.02642
GO:0009691	cytokinin biosynthetic process	14	3	0.02713
GO:0015908	fatty acid transport	14	3	0.02713
GO:0032259	methylation	241	8	0.02875
GO:0033500	carbohydrate homeostasis	24	4	0.03038
GO:0009688	abscisic acid biosynthetic process	21	3	0.03044
GO:0048838	release of seed from dormancy	6	2	0.03046
GO:0015713	phosphoglycerate transport	6	2	0.03046
GO:1904659	glucose transmembrane transport	6	2	0.03046
GO:0009805	coumarin biosynthetic process	6	2	0.03046
GO:0006164	purine nucleotide biosynthetic process	119	4	0.0307
GO:0080167	response to karrikin	125	11	0.03853
GO:0000122	negative regulation of transcription from RNA polymerase II promoter	27	4	0.03866
GO:0071577	zinc II ion transmembrane transport	16	3	0.03887
GO:0030308	negative regulation of cell growth	16	3	0.03887
GO:2001009	regulation of plant-type cell wall cellulose biosynthetic process	7	2	0.04131
GO:0010325	raffinose family oligosaccharide biosynthetic process	7	2	0.04131
GO:0007231	osmosensory signaling pathway	7	2	0.04131
GO:0046345	abscisic acid catabolic process	7	2	0.04131
GO:0009741	response to brassinosteroid	88	7	0.04343
GO:0009733	response to auxin	314	22	0.04489
GO:0043069	negative regulation of programmed cell death	25	4	0.04547
GO:0045490	pectin catabolic process	41	5	0.04559
GO:0016102	diterpenoid biosynthetic process	42	7	0.04787
GO:0070509	calcium ion import	4	2	0.04805
GO:0045730	respiratory burst	8	2	0.04806
GO:1900067	regulation of cellular response to alkaline pH	1	1	0.0481
GO:0018008	N-terminal peptidyl-glycine N-myristoylation	1	1	0.0481
GO:1904526	regulation of microtubule binding	1	1	0.0481
GO:0071287	cellular response to manganese ion	1	1	0.0481
GO:0043619	regulation of transcription from RNA polymerase II promoter in response to oxidative stress	1	1	0.0481
GO:0006580	ethanolamine metabolic process	1	1	0.0481
GO:0010064	embryonic shoot morphogenesis	1	1	0.0481
GO:0007040	lysosome organization	1	1	0.0481
GO:0051070	galactomannan biosynthetic process	1	1	0.0481
GO:1990532	stress response to nickel ion	1	1	0.0481
GO:0048205	COPI coating of Golgi vesicle	1	1	0.0481
GO:2000300	regulation of synaptic vesicle exocytosis	1	1	0.0481
GO:1901045	negative regulation of oviposition	1	1	0.0481
GO:0097237	cellular response to toxic substance	1	1	0.0481
GO:0060416	response to growth hormone	1	1	0.0481
GO:1903329	regulation of iron-sulfur cluster assembly	1	1	0.0481
GO:0018920	glyphosate metabolic process	1	1	0.0481
GO:0042353	fucose biosynthetic process	1	1	0.0481
GO:1901847	nicotinate metabolic process	1	1	0.0481
GO:0010392	galactoglucomannan metabolic process	1	1	0.0481
GO:0009825	multidimensional cell growth	42	5	0.04979

## Sheet: EL_6h v CK Down
GO ID	GO term	Annotated gene number	Enriched gene number	P value
GO:0009768	photosynthesis, light harvesting in photosystem I	27	13	7.7e-13
GO:0009409	response to cold	454	46	1.1e-12
GO:0015995	chlorophyll biosynthetic process	66	18	2.7e-11
GO:0009416	response to light stimulus	812	71	1.1e-09
GO:0009773	photosynthetic electron transport in photosystem I	18	9	1.9e-09
GO:0009644	response to high light intensity	74	17	5.4e-08
GO:0055114	oxidation-reduction process	727	64	2.3e-07
GO:0009658	chloroplast organization	242	28	4.5e-07
GO:0009645	response to low light intensity stimulus	17	7	5.5e-07
GO:0010207	photosystem II assembly	32	9	2.6e-06
GO:0007623	circadian rhythm	148	15	1.3e-05
GO:0010196	nonphotochemical quenching	22	6	6.5e-05
GO:0010422	regulation of brassinosteroid biosynthetic process	8	4	7.8e-05
GO:0042549	photosystem II stabilization	8	4	7.8e-05
GO:0019252	starch biosynthetic process	39	8	9.1e-05
GO:0070413	trehalose metabolism in response to stress	9	4	0.00014
GO:0019253	reductive pentose-phosphate cycle	25	6	0.00014
GO:0009767	photosynthetic electron transport chain	62	19	0.00017
GO:0010027	thylakoid membrane organization	63	9	0.00024
GO:0048544	recognition of pollen	140	14	0.00026
GO:0010206	photosystem II repair	11	4	0.00034
GO:0045454	cell redox homeostasis	87	10	0.00065
GO:0015979	photosynthesis	227	55	0.00106
GO:0016123	xanthophyll biosynthetic process	7	3	0.00118
GO:0005992	trehalose biosynthetic process	15	4	0.00127
GO:0010205	photoinhibition	15	4	0.00127
GO:0009854	oxidative photosynthetic carbon pathway	8	3	0.00185
GO:0019464	glycine decarboxylation via glycine cleavage system	8	3	0.00185
GO:0015976	carbon utilization	9	3	0.0027
GO:0005978	glycogen biosynthetic process	9	3	0.0027
GO:0006565	L-serine catabolic process	9	3	0.0027
GO:0010190	cytochrome b6f complex assembly	9	3	0.0027
GO:0019264	glycine biosynthetic process from serine	9	3	0.0027
GO:0009769	photosynthesis, light harvesting in photosystem II	9	3	0.0027
GO:0009902	chloroplast relocation	19	3	0.00328
GO:0018026	peptidyl-lysine monomethylation	10	3	0.00377
GO:0009643	photosynthetic acclimation	10	3	0.00377
GO:0043085	positive regulation of catalytic activity	104	6	0.00477
GO:0035304	regulation of protein dephosphorylation	33	6	0.005
GO:0080163	regulation of protein serine/threonine phosphatase activity	11	3	0.00505
GO:0046655	folic acid metabolic process	11	3	0.00505
GO:0019447	D-cysteine catabolic process	4	2	0.00643
GO:0060178	regulation of exocyst localization	4	2	0.00643
GO:0042372	phylloquinone biosynthetic process	12	3	0.00657
GO:0006000	fructose metabolic process	13	3	0.00833
GO:0010380	regulation of chlorophyll biosynthetic process	25	4	0.00902
GO:0034599	cellular response to oxidative stress	81	8	0.01026
GO:0043153	entrainment of circadian clock by photoperiod	5	2	0.01048
GO:0002220	innate immune response activating cell surface receptor signaling pathway	5	2	0.01048
GO:0035999	tetrahydrofolate interconversion	15	3	0.01261
GO:0009753	response to jasmonic acid	211	10	0.01403
GO:0045038	protein import into chloroplast thylakoid membrane	6	2	0.01538
GO:1990170	stress response to cadmium ion	6	2	0.01538
GO:0009061	anaerobic respiration	6	2	0.01538
GO:0009234	menaquinone biosynthetic process	6	2	0.01538
GO:0009871	jasmonic acid and ethylene-dependent systemic resistance, ethylene mediated signaling pathway	17	3	0.01793
GO:0032544	plastid translation	17	3	0.01793
GO:0048564	photosystem I assembly	17	3	0.01793
GO:0009646	response to absence of light	47	5	0.02
GO:0016998	cell wall macromolecule catabolic process	18	3	0.021
GO:0030187	melatonin biosynthetic process	18	3	0.021
GO:0010304	PSII associated light-harvesting complex II catabolic process	7	2	0.02105
GO:0016554	cytidine to uridine editing	32	4	0.02134
GO:0080167	response to karrikin	125	9	0.02479
GO:0019676	ammonia assimilation cycle	8	2	0.02745
GO:0016120	carotene biosynthetic process	8	2	0.02745
GO:0006624	vacuolar protein processing	8	2	0.02745
GO:0042550	photosystem I stabilization	8	2	0.02745
GO:0010021	amylopectin biosynthetic process	8	2	0.02745
GO:0009853	photorespiration	47	8	0.02817
GO:0031425	chloroplast RNA processing	32	5	0.03155
GO:0000160	phosphorelay signal transduction system	109	7	0.03164
GO:0030388	fructose 1,6-bisphosphate metabolic process	21	3	0.03179
GO:0046686	response to cadmium ion	412	23	0.0323
GO:1901401	regulation of tetrapyrrole metabolic process	29	5	0.03333
GO:0032194	ubiquinone biosynthetic process via 3,4-dihydroxy-5-polyprenylbenzoate	1	1	0.03351
GO:0010323	negative regulation of isopentenyl diphosphate biosynthetic process, methylerythritol 4-phosphate pathway	1	1	0.03351
GO:0018131	oxazole or thiazole biosynthetic process	1	1	0.03351
GO:0090414	molybdate ion export from vacuole	1	1	0.03351
GO:0032055	negative regulation of translation in response to stress	1	1	0.03351
GO:1902348	cellular response to strigolactone	1	1	0.03351
GO:0010430	fatty acid omega-oxidation	1	1	0.03351
GO:0046373	L-arabinose metabolic process	1	1	0.03351
GO:0019424	sulfide oxidation, using siroheme sulfite reductase	1	1	0.03351
GO:0071000	response to magnetism	1	1	0.03351
GO:0012502	induction of programmed cell death	1	1	0.03351
GO:0080114	positive regulation of glycine hydroxymethyltransferase activity	1	1	0.03351
GO:0043419	urea catabolic process	1	1	0.03351
GO:0042371	vitamin K biosynthetic process	1	1	0.03351
GO:0010254	nectary development	1	1	0.03351
GO:0010241	ent-kaurene oxidation to kaurenoic acid	1	1	0.03351
GO:0051083	'de novo' cotranslational protein folding	1	1	0.03351
GO:0000735	removal of nonhomologous ends	1	1	0.03351
GO:0010117	photoprotection	9	2	0.03452
GO:0010150	leaf senescence	157	9	0.03799
GO:0071456	cellular response to hypoxia	202	12	0.03985
GO:0006730	one-carbon metabolic process	25	5	0.04188
GO:0032502	developmental process	3060	81	0.04392
GO:1900865	chloroplast RNA modification	41	4	0.04759
GO:0061077	chaperone-mediated protein folding	77	6	0.04958
