# Supplementary material for: Comparative Transcriptome Analysis Identifies Key Defense Genes and Mechanisms in Mulberry (Morus alba) Leaves against Silkworms (Bombyx mori)
Source: Int J Mol Sci. 2022 Nov 4;23(21):13519. doi: 10.3390/ijms232113519 (PMC9656888; doi:10.3390/ijms232113519)
Supplement: Supplementary file 1 [file ijms-23-13519-s001.zip › Table S3.xlsx]

## Sheet: EL_3h v CK Up
Term	Sample number	Background number	P-value
alpha-Linolenic acid metabolism	21	48	3.22043e-08
Phenylpropanoid biosynthesis	25	112	5.20717e-05
Linoleic acid metabolism	9	19	0.000188347
Sesquiterpenoid and triterpenoid biosynthesis	10	24	0.000190445
Amino sugar and nucleotide sugar metabolism	22	111	0.000610754
Terpenoid backbone biosynthesis	12	48	0.00206705
Phenylalanine metabolism	12	50	0.00276298
Stilbenoid, diarylheptanoid and gingerol biosynthesis	7	19	0.00310674
Phenylalanine, tyrosine and tryptophan biosynthesis	11	50	0.00714219
Fatty acid degradation	9	42	0.0164372
Starch and sucrose metabolism	23	163	0.0190916
Synthesis and degradation of ketone bodies	3	6	0.0282282
Ascorbate and aldarate metabolism	9	47	0.0289428
Plant hormone signal transduction	26	202	0.0334315
Protein processing in endoplasmic reticulum	29	237	0.0429658
Vitamin B6 metabolism	4	14	0.0474432

## Sheet: EL_3h v CK Down
Term	Sample number	Background number	P-value
Porphyrin and chlorophyll metabolism	15	45	1.03498e-07
Photosynthesis	15	55	9.0043e-07
Photosynthesis - antenna proteins	10	24	2.92084e-06
Carbon fixation in photosynthetic organisms	13	91	0.00146371
Tryptophan metabolism	7	34	0.00320419
Glyoxylate and dicarboxylate metabolism	12	89	0.00338856
Pentose phosphate pathway	9	61	0.00635241
Plant hormone signal transduction	19	202	0.0106767
Starch and sucrose metabolism	16	163	0.0130302
Arachidonic acid metabolism	5	25	0.0136498
Glycolysis / Gluconeogenesis	14	136	0.0138042
Circadian rhythm - plant	8	58	0.0138853
Thiamine metabolism	3	10	0.022502
Glycerolipid metabolism	7	54	0.027282
Fructose and mannose metabolism	8	67	0.0280724

## Sheet: EL_6h v CK Up
Term	Sample number	Background number	P-value
alpha-Linolenic acid metabolism	15	48	4.15896e-07
Sesquiterpenoid and triterpenoid biosynthesis	8	24	0.000154738
Terpenoid backbone biosynthesis	11	48	0.000164565
Stilbenoid, diarylheptanoid and gingerol biosynthesis	7	19	0.000244418
Phenylpropanoid biosynthesis	17	112	0.00028398
Linoleic acid metabolism	6	19	0.00132926
Plant hormone signal transduction	22	202	0.00237541
Diterpenoid biosynthesis	5	23	0.0126554
Carotenoid biosynthesis	5	24	0.0146673
Zeatin biosynthesis	4	16	0.0170109
Starch and sucrose metabolism	16	163	0.0206221
Amino sugar and nucleotide sugar metabolism	12	111	0.023054
Flavonoid biosynthesis	6	39	0.0259164
Fatty acid degradation	6	42	0.03439

## Sheet: EL_6h v CK Down
Table S3. The KEGG pathways enriched by the dys-regulated unigenes.
Term	Sample number	Background number	P-value
Photosynthesis	19	55	6.24688e-12
Photosynthesis - antenna proteins	11	24	1.93775e-08
Porphyrin and chlorophyll metabolism	11	45	3.5461e-06
Nitrogen metabolism	8	37	0.000164622
Glyoxylate and dicarboxylate metabolism	12	89	0.00023867
Carbon fixation in photosynthetic organisms	9	91	0.00930878
Arachidonic acid metabolism	4	25	0.0188273
Zeatin biosynthesis	3	16	0.0287347
Cyanoamino acid metabolism	5	48	0.040134
