# Supplementary material for: Comparative Transcriptome Analysis Identifies Key Defense Genes and Mechanisms in Mulberry (Morus alba) Leaves against Silkworms (Bombyx mori)
Source: Int J Mol Sci. 2022 Nov 4;23(21):13519. doi: 10.3390/ijms232113519 (PMC9656888; doi:10.3390/ijms232113519)
Supplement: Supplementary file 1 [file ijms-23-13519-s001.zip › Table S4.xlsx]

## Sheet: Sheet1
Table S4. The biological processes (BP) terms enriched by the unigenes of six clusters.
cluster	GO ID	GO term	Annotated gene number	Enriched gene number	P value
cluster1	GO:0006412	translation	741	47	9.9e-12
cluster1	GO:0002181	cytoplasmic translation	98	12	1.7e-08
cluster1	GO:0010055	atrichoblast differentiation	3	3	3.1e-06
cluster1	GO:0043620	regulation of DNA-templated transcription in response to stress	7	3	0.0001
cluster1	GO:0000028	ribosomal small subunit assembly	41	5	0.00032
cluster1	GO:0010252	auxin homeostasis	44	5	0.00044
cluster1	GO:0046686	response to cadmium ion	412	15	0.00115
cluster1	GO:0032107	regulation of response to nutrient levels	16	3	0.00151
cluster1	GO:0080092	regulation of pollen tube growth	16	3	0.00151
cluster1	GO:0000027	ribosomal large subunit assembly	62	5	0.00212
cluster1	GO:0048527	lateral root development	113	5	0.00418
cluster1	GO:0009739	response to gibberellin	106	6	0.00519
cluster1	GO:0061077	chaperone-mediated protein folding	77	5	0.00555
cluster1	GO:0000122	negative regulation of transcription from RNA polymerase II promoter	27	3	0.007
cluster1	GO:0071329	cellular response to sucrose stimulus	9	2	0.00719
cluster1	GO:0045454	cell redox homeostasis	87	5	0.00904
cluster1	GO:0071456	cellular response to hypoxia	202	8	0.00997
cluster1	GO:0009913	epidermal cell differentiation	19	3	0.01271
cluster1	GO:2000033	regulation of seed dormancy process	12	2	0.0128
cluster1	GO:0051792	medium-chain fatty acid biosynthetic process	1	1	0.01465
cluster1	GO:1901141	regulation of lignin biosynthetic process	18	3	0.01488
cluster1	GO:0051262	protein tetramerization	13	2	0.01499
cluster1	GO:0006949	syncytium formation	13	2	0.01499
cluster1	GO:0010466	negative regulation of peptidase activity	14	2	0.01732
cluster1	GO:0010029	regulation of seed germination	95	5	0.01923
cluster1	GO:0015990	electron transport coupled proton transport	15	2	0.01979
cluster1	GO:0071577	zinc II ion transmembrane transport	16	2	0.0224
cluster1	GO:0035435	phosphate ion transmembrane transport	16	2	0.0224
cluster1	GO:0009116	nucleoside metabolic process	321	12	0.0241
cluster1	GO:0009625	response to insect	43	3	0.02492
cluster1	GO:0009871	jasmonic acid and ethylene-dependent systemic resistance, ethylene mediated signaling pathway	17	2	0.02514
cluster1	GO:0006414	translational elongation	74	5	0.02603
cluster1	GO:0009408	response to heat	255	9	0.02749
cluster1	GO:0007263	nitric oxide mediated signal transduction	2	1	0.02908
cluster1	GO:1901140	p-coumaryl alcohol transport	2	1	0.02908
cluster1	GO:0010086	embryonic root morphogenesis	2	1	0.02908
cluster1	GO:0015671	oxygen transport	2	1	0.02908
cluster1	GO:0006106	fumarate metabolic process	2	1	0.02908
cluster1	GO:0009060	aerobic respiration	87	4	0.02957
cluster1	GO:0046685	response to arsenic-containing substance	19	2	0.03102
cluster1	GO:0009646	response to absence of light	47	3	0.03138
cluster1	GO:0006952	defense response	1606	18	0.03216
cluster1	GO:0010183	pollen tube guidance	21	2	0.03737
cluster1	GO:1901997	negative regulation of indoleacetic acid biosynthetic process via tryptophan	3	1	0.0433
cluster1	GO:0015808	L-alanine transport	3	1	0.0433
cluster1	GO:0015690	aluminum cation transport	3	1	0.0433
cluster1	GO:0010253	UDP-rhamnose biosynthetic process	3	1	0.0433
cluster1	GO:0010246	rhamnogalacturonan I biosynthetic process	3	1	0.0433
cluster1	GO:0009651	response to salt stress	460	12	0.04658
cluster1	GO:0042273	ribosomal large subunit biogenesis	140	10	0.04909
cluster2	GO:0009611	response to wounding	274	71	1.3e-17
cluster2	GO:0031408	oxylipin biosynthetic process	40	22	7.9e-14
cluster2	GO:0009695	jasmonic acid biosynthetic process	65	28	1e-13
cluster2	GO:0009753	response to jasmonic acid	211	52	7.5e-12
cluster2	GO:0080027	response to herbivore	21	13	1.4e-09
cluster2	GO:0034440	lipid oxidation	88	18	1.4e-09
cluster2	GO:0010597	green leaf volatile biosynthetic process	10	9	2.3e-09
cluster2	GO:0045489	pectin biosynthetic process	49	20	4.3e-09
cluster2	GO:0055085	transmembrane transport	787	104	2.1e-06
cluster2	GO:0009809	lignin biosynthetic process	79	19	2.2e-06
cluster2	GO:0019373	epoxygenase P450 pathway	7	6	2.6e-06
cluster2	GO:0009617	response to bacterium	1105	89	4.1e-06
cluster2	GO:0009620	response to fungus	401	62	4.3e-06
cluster2	GO:0016127	sterol catabolic process	5	5	4.7e-06
cluster2	GO:0034434	sterol esterification	5	5	4.7e-06
cluster2	GO:2000022	regulation of jasmonic acid mediated signaling pathway	31	12	4.7e-06
cluster2	GO:0009969	xyloglucan biosynthetic process	14	8	5.5e-06
cluster2	GO:0006486	protein glycosylation	137	27	8.1e-06
cluster2	GO:0016125	sterol metabolic process	72	21	9.1e-06
cluster2	GO:0009834	plant-type secondary cell wall biogenesis	73	21	1.2e-05
cluster2	GO:0055114	oxidation-reduction process	727	91	1.3e-05
cluster2	GO:0002213	defense response to insect	24	12	2e-05
cluster2	GO:0019287	isopentenyl diphosphate biosynthetic process, mevalonate pathway	9	6	2.7e-05
cluster2	GO:0009073	aromatic amino acid family biosynthetic process	47	12	0.00012
cluster2	GO:0030244	cellulose biosynthetic process	63	17	0.00015
cluster2	GO:0009828	plant-type cell wall loosening	16	7	0.0002
cluster2	GO:0051762	sesquiterpene biosynthetic process	8	5	0.00021
cluster2	GO:0009751	response to salicylic acid	146	24	0.00023
cluster2	GO:0009414	response to water deprivation	387	52	0.00027
cluster2	GO:0009423	chorismate biosynthetic process	9	5	0.00044
cluster2	GO:0010088	phloem development	25	9	0.00044
cluster2	GO:0045490	pectin catabolic process	41	11	0.00052
cluster2	GO:0045337	farnesyl diphosphate biosynthetic process	6	4	0.00064
cluster2	GO:0033231	carbohydrate export	3	3	0.00064
cluster2	GO:1902334	fructose export from vacuole to cytoplasm	3	3	0.00064
cluster2	GO:1990059	fruit valve development	3	3	0.00064
cluster2	GO:0033384	geranyl diphosphate biosynthetic process	3	3	0.00064
cluster2	GO:0048838	release of seed from dormancy	6	4	0.00071
cluster2	GO:0009833	plant-type primary cell wall biogenesis	25	8	0.00084
cluster2	GO:0050832	defense response to fungus	306	39	0.00105
cluster2	GO:0042545	cell wall modification	101	21	0.00106
cluster2	GO:0006636	unsaturated fatty acid biosynthetic process	21	7	0.00136
cluster2	GO:0016106	sesquiterpenoid biosynthetic process	32	8	0.00139
cluster2	GO:0007267	cell-cell signaling	25	7	0.00139
cluster2	GO:0043693	monoterpene biosynthetic process	7	4	0.00155
cluster2	GO:0030397	membrane disassembly	7	4	0.00155
cluster2	GO:0080167	response to karrikin	125	21	0.00222
cluster2	GO:0098712	L-glutamate import across plasma membrane	4	3	0.00238
cluster2	GO:0042546	cell wall biogenesis	201	53	0.00271
cluster2	GO:0009624	response to nematode	79	15	0.00274
cluster2	GO:0009866	induced systemic resistance, ethylene mediated signaling pathway	8	4	0.00288
cluster2	GO:0009832	plant-type cell wall biogenesis	158	43	0.00293
cluster2	GO:0009813	flavonoid biosynthetic process	93	21	0.00312
cluster2	GO:0006949	syncytium formation	13	5	0.00335
cluster2	GO:0071493	cellular response to UV-B	13	5	0.00335
cluster2	GO:0010192	mucilage biosynthetic process	27	6	0.00483
cluster2	GO:0006564	L-serine biosynthetic process	9	4	0.00484
cluster2	GO:0006952	defense response	1606	148	0.0055
cluster2	GO:0034635	glutathione transport	5	3	0.00557
cluster2	GO:0080051	cutin transport	5	3	0.00557
cluster2	GO:0034976	response to endoplasmic reticulum stress	113	16	0.00655
cluster2	GO:0019432	triglyceride biosynthetic process	27	7	0.00659
cluster2	GO:0006722	triterpenoid metabolic process	15	6	0.00737
cluster2	GO:0010373	negative regulation of gibberellin biosynthetic process	2	2	0.0074
cluster2	GO:0042425	choline biosynthetic process	2	2	0.0074
cluster2	GO:0015742	alpha-ketoglutarate transport	2	2	0.0074
cluster2	GO:1903942	positive regulation of respiratory gaseous exchange	2	2	0.0074
cluster2	GO:0033386	geranylgeranyl diphosphate biosynthetic process	2	2	0.0074
cluster2	GO:0033389	putrescine biosynthetic process from arginine, using agmatinase	2	2	0.0074
cluster2	GO:1902039	negative regulation of seed dormancy process	2	2	0.0074
cluster2	GO:0019305	dTDP-rhamnose biosynthetic process	2	2	0.0074
cluster2	GO:0006730	one-carbon metabolic process	25	7	0.00749
cluster2	GO:0010067	procambium histogenesis	10	4	0.00752
cluster2	GO:0009650	UV protection	10	4	0.00752
cluster2	GO:0016114	terpenoid biosynthetic process	148	34	0.0087
cluster2	GO:0006891	intra-Golgi vesicle-mediated transport	36	8	0.0101
cluster2	GO:0015780	nucleotide-sugar transport	23	8	0.01036
cluster2	GO:0009251	glucan catabolic process	29	6	0.01041
cluster2	GO:0033500	carbohydrate homeostasis	24	5	0.01042
cluster2	GO:0071423	malate transmembrane transport	6	3	0.01043
cluster2	GO:0009805	coumarin biosynthetic process	6	3	0.01043
cluster2	GO:0010214	seed coat development	45	8	0.01131
cluster2	GO:0072657	protein localization to membrane	126	10	0.01221
cluster2	GO:0005975	carbohydrate metabolic process	905	155	0.01449
cluster2	GO:0009694	jasmonic acid metabolic process	77	32	0.01462
cluster2	GO:0005985	sucrose metabolic process	44	8	0.01551
cluster2	GO:0016192	vesicle-mediated transport	401	38	0.01575
cluster2	GO:0045487	gibberellin catabolic process	7	3	0.0171
cluster2	GO:0007231	osmosensory signaling pathway	7	3	0.0171
cluster2	GO:0046345	abscisic acid catabolic process	7	3	0.0171
cluster2	GO:0009807	lignan biosynthetic process	7	3	0.0171
cluster2	GO:0046294	formaldehyde catabolic process	7	3	0.0171
cluster2	GO:0006890	retrograde vesicle-mediated transport, Golgi to ER	32	7	0.01713
cluster2	GO:0090351	seedling development	224	18	0.0174
cluster2	GO:0010311	lateral root formation	55	10	0.01774
cluster2	GO:0051555	flavonol biosynthetic process	15	5	0.02074
cluster2	GO:0010215	cellulose microfibril organization	13	4	0.02077
cluster2	GO:0015970	guanosine tetraphosphate biosynthetic process	3	2	0.02094
cluster2	GO:0010253	UDP-rhamnose biosynthetic process	3	2	0.02094
cluster2	GO:0010289	homogalacturonan biosynthetic process	3	2	0.02094
cluster2	GO:0015714	phosphoenolpyruvate transport	3	2	0.02094
cluster2	GO:0046177	D-gluconate catabolic process	3	2	0.02094
cluster2	GO:1900366	negative regulation of defense response to insect	3	2	0.02094
cluster2	GO:0015808	L-alanine transport	3	2	0.02094
cluster2	GO:0080173	male-female gamete recognition during double fertilization	3	2	0.02094
cluster2	GO:0043182	vacuolar sequestering of sodium ion	3	2	0.02094
cluster2	GO:0006065	UDP-glucuronate biosynthetic process	3	2	0.02094
cluster2	GO:0072334	UDP-galactose transmembrane transport	3	2	0.02094
cluster2	GO:0009733	response to auxin	314	36	0.02178
cluster2	GO:2000652	regulation of secondary cell wall biogenesis	23	6	0.02432
cluster2	GO:0019745	pentacyclic triterpenoid biosynthetic process	8	3	0.02562
cluster2	GO:0048759	xylem vessel member cell differentiation	8	3	0.02562
cluster2	GO:0033540	fatty acid beta-oxidation using acyl-CoA oxidase	8	3	0.02562
cluster2	GO:0010089	xylem development	43	10	0.02713
cluster2	GO:0009789	positive regulation of abscisic acid-activated signaling pathway	43	8	0.0284
cluster2	GO:0006629	lipid metabolic process	878	131	0.02893
cluster2	GO:0010200	response to chitin	117	16	0.0302
cluster2	GO:0032259	methylation	241	12	0.03282
cluster2	GO:0052324	plant-type cell wall cellulose biosynthetic process	16	5	0.03593
cluster2	GO:0015908	fatty acid transport	14	4	0.03598
cluster2	GO:0051512	positive regulation of unidimensional cell growth	9	3	0.03602
cluster2	GO:0048766	root hair initiation	9	3	0.03602
cluster2	GO:0018401	peptidyl-proline hydroxylation to 4-hydroxy-L-proline	9	3	0.03602
cluster2	GO:0055074	calcium ion homeostasis	62	7	0.03949
cluster2	GO:0034625	fatty acid elongation, monounsaturated fatty acid	4	2	0.03949
cluster2	GO:0034626	fatty acid elongation, polyunsaturated fatty acid	4	2	0.03949
cluster2	GO:0010412	mannan metabolic process	4	2	0.03949
cluster2	GO:0015790	UDP-xylose transport	4	2	0.03949
cluster2	GO:0046901	tetrahydrofolylpolyglutamate biosynthetic process	4	2	0.03949
cluster2	GO:0019367	fatty acid elongation, saturated fatty acid	4	2	0.03949
cluster2	GO:0006024	glycosaminoglycan biosynthetic process	4	2	0.03949
cluster2	GO:1901747	prephenate(2-) biosynthetic process	4	2	0.03949
cluster2	GO:0046208	spermine catabolic process	4	2	0.03949
cluster2	GO:0015689	molybdate ion transport	4	2	0.03949
cluster2	GO:0030968	endoplasmic reticulum unfolded protein response	44	8	0.03972
cluster2	GO:0010015	root morphogenesis	260	36	0.04156
cluster2	GO:0000038	very long-chain fatty acid metabolic process	35	7	0.0429
cluster2	GO:0002229	defense response to oomycetes	60	9	0.04558
cluster2	GO:0006886	intracellular protein transport	480	40	0.04621
cluster2	GO:0009664	plant-type cell wall organization	99	28	0.04679
cluster2	GO:0030307	positive regulation of cell growth	19	6	0.04805
cluster2	GO:0043069	negative regulation of programmed cell death	25	5	0.04817
cluster2	GO:0009800	cinnamic acid biosynthetic process	10	3	0.04823
cluster2	GO:0010047	fruit dehiscence	10	3	0.04823
cluster2	GO:0007165	signal transduction	1284	140	0.04943
cluster3	GO:0006412	translation	741	73	6.6e-21
cluster3	GO:0002181	cytoplasmic translation	98	16	7.8e-10
cluster3	GO:0000027	ribosomal large subunit assembly	62	12	1.4e-08
cluster3	GO:0000028	ribosomal small subunit assembly	41	8	3.6e-06
cluster3	GO:0006267	pre-replicative complex assembly involved in nuclear cell cycle DNA replication	9	4	3.2e-05
cluster3	GO:0045490	pectin catabolic process	41	7	3.7e-05
cluster3	GO:1902975	mitotic DNA replication initiation	4	3	4.8e-05
cluster3	GO:0006979	response to oxidative stress	443	21	9.8e-05
cluster3	GO:0000727	double-strand break repair via break-induced replication	12	4	0.00012
cluster3	GO:0042273	ribosomal large subunit biogenesis	140	20	0.0002
cluster3	GO:0009955	adaxial/abaxial pattern specification	57	7	0.00032
cluster3	GO:0010501	RNA secondary structure unwinding	7	3	0.0004
cluster3	GO:0050821	protein stabilization	35	5	0.00116
cluster3	GO:0009800	cinnamic acid biosynthetic process	10	3	0.00129
cluster3	GO:0019722	calcium-mediated signaling	53	6	0.00132
cluster3	GO:0006268	DNA unwinding involved in DNA replication	22	4	0.00146
cluster3	GO:0005513	detection of calcium ion	12	3	0.00228
cluster3	GO:0000462	maturation of SSU-rRNA from tricistronic rRNA transcript (SSU-rRNA, 5.8S rRNA, LSU-rRNA)	42	5	0.00266
cluster3	GO:0034976	response to endoplasmic reticulum stress	113	7	0.00362
cluster3	GO:0045454	cell redox homeostasis	87	7	0.00392
cluster3	GO:0050826	response to freezing	29	4	0.00417
cluster3	GO:0030865	cortical cytoskeleton organization	50	4	0.00448
cluster3	GO:0006559	L-phenylalanine catabolic process	15	3	0.00449
cluster3	GO:0010100	negative regulation of photomorphogenesis	15	3	0.00449
cluster3	GO:0009611	response to wounding	274	15	0.00526
cluster3	GO:0009612	response to mechanical stimulus	28	5	0.00536
cluster3	GO:0009617	response to bacterium	1105	37	0.00607
cluster3	GO:0032508	DNA duplex unwinding	40	7	0.00746
cluster3	GO:0046685	response to arsenic-containing substance	19	3	0.00892
cluster3	GO:0009631	cold acclimation	57	5	0.00991
cluster3	GO:0042989	sequestering of actin monomers	7	2	0.01029
cluster3	GO:0043693	monoterpene biosynthetic process	7	2	0.01029
cluster3	GO:0031222	arabinan catabolic process	7	2	0.01029
cluster3	GO:0051228	mitotic spindle disassembly	7	2	0.01029
cluster3	GO:0000266	mitochondrial fission	20	3	0.01032
cluster3	GO:0042545	cell wall modification	101	7	0.01087
cluster3	GO:0006952	defense response	1606	50	0.01088
cluster3	GO:0051301	cell division	331	9	0.01194
cluster3	GO:0030970	retrograde protein transport, ER to cytosol	8	2	0.01351
cluster3	GO:0045903	positive regulation of translational fidelity	8	2	0.01351
cluster3	GO:2000122	negative regulation of stomatal complex development	8	2	0.01351
cluster3	GO:0006228	UTP biosynthetic process	8	2	0.01351
cluster3	GO:1902626	assembly of large subunit precursor of preribosome	9	2	0.0171
cluster3	GO:0006183	GTP biosynthetic process	9	2	0.0171
cluster3	GO:2000032	regulation of secondary shoot formation	9	2	0.0171
cluster3	GO:0006913	nucleocytoplasmic transport	109	3	0.01721
cluster3	GO:0050832	defense response to fungus	306	15	0.01755
cluster3	GO:0061077	chaperone-mediated protein folding	77	7	0.01878
cluster3	GO:0015706	nitrate transport	26	3	0.02127
cluster3	GO:0018117	protein adenylylation	1	1	0.02303
cluster3	GO:0031623	receptor internalization	1	1	0.02303
cluster3	GO:0003374	dynamin polymerization involved in mitochondrial fission	1	1	0.02303
cluster3	GO:0060773	flower phyllotactic patterning	1	1	0.02303
cluster3	GO:0016185	synaptic vesicle budding from presynaptic membrane	1	1	0.02303
cluster3	GO:0060867	fruit abscission	1	1	0.02303
cluster3	GO:0006679	glucosylceramide biosynthetic process	1	1	0.02303
cluster3	GO:0010046	response to mycotoxin	1	1	0.02303
cluster3	GO:0050803	regulation of synapse structure or activity	1	1	0.02303
cluster3	GO:0000122	negative regulation of transcription from RNA polymerase II promoter	27	3	0.02353
cluster3	GO:0006165	nucleoside diphosphate phosphorylation	89	6	0.02509
cluster3	GO:0032956	regulation of actin cytoskeleton organization	52	5	0.0251
cluster3	GO:0009864	induced systemic resistance, jasmonic acid mediated signaling pathway	11	2	0.02535
cluster3	GO:0045493	xylan catabolic process	11	2	0.02535
cluster3	GO:0009585	red, far-red light phototransduction	28	3	0.02592
cluster3	GO:0034605	cellular response to heat	69	5	0.02763
cluster3	GO:0009834	plant-type secondary cell wall biogenesis	73	5	0.02765
cluster3	GO:0009863	salicylic acid mediated signaling pathway	50	4	0.02776
cluster3	GO:0046686	response to cadmium ion	412	16	0.02974
cluster3	GO:0097352	autophagosome maturation	12	2	0.02997
cluster3	GO:0010187	negative regulation of seed germination	30	3	0.03106
cluster3	GO:0051085	chaperone mediated protein folding requiring cofactor	52	4	0.0315
cluster3	GO:0006457	protein folding	221	14	0.03236
cluster3	GO:0042744	hydrogen peroxide catabolic process	31	3	0.03382
cluster3	GO:0010417	glucuronoxylan biosynthetic process	13	2	0.03488
cluster3	GO:0006414	translational elongation	74	6	0.03508
cluster3	GO:0009809	lignin biosynthetic process	79	5	0.03556
cluster3	GO:0009819	drought recovery	14	2	0.04009
cluster3	GO:0052544	defense response by callose deposition in cell wall	14	2	0.04009
cluster3	GO:0009691	cytokinin biosynthetic process	14	2	0.04009
cluster3	GO:0006241	CTP biosynthetic process	14	2	0.04009
cluster3	GO:0009965	leaf morphogenesis	128	7	0.04462
cluster3	GO:0071668	plant-type cell wall assembly	15	2	0.04544
cluster3	GO:0032350	regulation of hormone metabolic process	30	2	0.04548
cluster3	GO:0015864	pyrimidine nucleoside transport	2	1	0.04552
cluster3	GO:0006567	threonine catabolic process	2	1	0.04552
cluster3	GO:0071249	cellular response to nitrate	2	1	0.04552
cluster3	GO:0019605	butyrate metabolic process	2	1	0.04552
cluster3	GO:0010111	glyoxysome organization	2	1	0.04552
cluster3	GO:0060862	negative regulation of floral organ abscission	2	1	0.04552
cluster3	GO:0016139	glycoside catabolic process	2	1	0.04552
cluster3	GO:0016099	monoterpenoid biosynthetic process	2	1	0.04552
cluster3	GO:0055047	generative cell mitosis	2	1	0.04552
cluster3	GO:0046104	thymidine metabolic process	2	1	0.04552
cluster3	GO:0030644	cellular chloride ion homeostasis	2	1	0.04552
cluster3	GO:0071311	cellular response to acetate	2	1	0.04552
cluster3	GO:0046274	lignin catabolic process	2	1	0.04552
cluster3	GO:0034620	cellular response to unfolded protein	59	3	0.04557
cluster3	GO:0009867	jasmonic acid mediated signaling pathway	96	7	0.04566
cluster3	GO:0009734	auxin-activated signaling pathway	85	5	0.04638
cluster4	GO:0006751	glutathione catabolic process	6	2	0.00013
cluster4	GO:0010224	response to UV-B	96	3	0.00279
cluster4	GO:0070544	histone H3-K36 demethylation	1	1	0.00293
cluster4	GO:0006269	DNA replication, synthesis of RNA primer	1	1	0.00293
cluster4	GO:0080167	response to karrikin	125	3	0.00585
cluster4	GO:0071289	cellular response to nickel ion	2	1	0.00585
cluster4	GO:1900386	positive regulation of flavonol biosynthetic process	2	1	0.00585
cluster4	GO:0080156	mitochondrial mRNA modification	42	2	0.00672
cluster4	GO:0071163	DNA replication preinitiation complex assembly	3	1	0.00876
cluster4	GO:0071492	cellular response to UV-A	3	1	0.00876
cluster4	GO:0060771	phyllotactic patterning	4	1	0.01167
cluster4	GO:0071490	cellular response to far red light	4	1	0.01167
cluster4	GO:0002220	innate immune response activating cell surface receptor signaling pathway	5	1	0.01456
cluster4	GO:0071486	cellular response to high light intensity	5	1	0.01456
cluster4	GO:0006556	S-adenosylmethionine biosynthetic process	5	1	0.01456
cluster4	GO:0060151	peroxisome localization	5	1	0.01456
cluster4	GO:0030174	regulation of DNA-dependent DNA replication initiation	6	1	0.01745
cluster4	GO:0051645	Golgi localization	6	1	0.01745
cluster4	GO:0009809	lignin biosynthetic process	79	2	0.02245
cluster4	GO:0090436	leaf pavement cell development	8	1	0.0232
cluster4	GO:0010117	photoprotection	9	1	0.02606
cluster4	GO:0010288	response to lead ion	9	1	0.02606
cluster4	GO:0051646	mitochondrion localization	9	1	0.02606
cluster4	GO:0080142	regulation of salicylic acid biosynthetic process	10	1	0.02892
cluster4	GO:0071219	cellular response to molecule of bacterial origin	10	1	0.02892
cluster4	GO:0046713	borate transport	10	1	0.02892
cluster4	GO:0071491	cellular response to red light	10	1	0.02892
cluster4	GO:0009963	positive regulation of flavonoid biosynthetic process	13	2	0.03114
cluster4	GO:0019762	glucosinolate catabolic process	12	1	0.0346
cluster4	GO:0010112	regulation of systemic acquired resistance	12	1	0.0346
cluster4	GO:0007004	telomere maintenance via telomerase	12	1	0.0346
cluster4	GO:0010036	response to boron-containing substance	12	1	0.0346
cluster4	GO:0030050	vesicle transport along actin filament	12	1	0.0346
cluster4	GO:0002221	pattern recognition receptor signaling pathway	13	1	0.03743
cluster4	GO:0010205	photoinhibition	15	1	0.04307
cluster4	GO:0048768	root hair cell tip growth	16	1	0.04588
cluster4	GO:0000076	DNA replication checkpoint	16	1	0.04588
cluster4	GO:0010200	response to chitin	117	2	0.04611
cluster5	GO:0016584	nucleosome positioning	9	3	4.2e-05
cluster5	GO:0006355	regulation of transcription, DNA-templated	1463	28	0.00011
cluster5	GO:0031936	negative regulation of chromatin silencing	12	3	0.00011
cluster5	GO:0045910	negative regulation of DNA recombination	21	3	0.00062
cluster5	GO:0080060	integument development	6	2	0.00095
cluster5	GO:0080141	regulation of jasmonic acid biosynthetic process	8	2	0.00176
cluster5	GO:0030261	chromosome condensation	30	3	0.00179
cluster5	GO:0051512	positive regulation of unidimensional cell growth	9	2	0.00225
cluster5	GO:0006334	nucleosome assembly	34	3	0.00258
cluster5	GO:0010052	guard cell differentiation	12	2	0.00406
cluster5	GO:0009911	positive regulation of flower development	50	3	0.00768
cluster5	GO:0010365	positive regulation of ethylene biosynthetic process	1	1	0.00809
cluster5	GO:0080180	2-methylguanosine metabolic process	1	1	0.00809
cluster5	GO:0048462	carpel formation	1	1	0.00809
cluster5	GO:0070994	detection of oxidative stress	1	1	0.00809
cluster5	GO:0010105	negative regulation of ethylene-activated signaling pathway	18	2	0.00912
cluster5	GO:0010039	response to iron ion	28	3	0.01001
cluster5	GO:0070981	L-asparagine biosynthetic process	2	1	0.01611
cluster5	GO:0005993	trehalose catabolic process	2	1	0.01611
cluster5	GO:0043617	cellular response to sucrose starvation	2	1	0.01611
cluster5	GO:0006593	ornithine catabolic process	2	1	0.01611
cluster5	GO:0071629	cytoplasm-associated proteasomal ubiquitin-dependent protein catabolic process	2	1	0.01611
cluster5	GO:0010362	negative regulation of anion channel activity by blue light	2	1	0.01611
cluster5	GO:0002100	tRNA wobble adenosine to inosine editing	2	1	0.01611
cluster5	GO:0046475	glycerophospholipid catabolic process	2	1	0.01611
cluster5	GO:0019544	arginine catabolic process to glutamate	2	1	0.01611
cluster5	GO:2000143	negative regulation of DNA-templated transcription, initiation	2	1	0.01611
cluster5	GO:1901347	negative regulation of secondary cell wall biogenesis	2	1	0.01611
cluster5	GO:0010155	regulation of proton transport	2	1	0.01611
cluster5	GO:0010121	arginine catabolic process to proline via ornithine	2	1	0.01611
cluster5	GO:0010133	proline catabolic process to glutamate	2	1	0.01611
cluster5	GO:0050891	multicellular organismal water homeostasis	2	1	0.01611
cluster5	GO:0009965	leaf morphogenesis	128	4	0.0202
cluster5	GO:0006154	adenosine catabolic process	3	1	0.02406
cluster5	GO:0006148	inosine catabolic process	3	1	0.02406
cluster5	GO:0042853	L-alanine catabolic process	3	1	0.02406
cluster5	GO:1901333	positive regulation of lateral root development	3	1	0.02406
cluster5	GO:0009413	response to flooding	3	1	0.02406
cluster5	GO:0010500	transmitting tissue development	3	1	0.02406
cluster5	GO:0048263	determination of dorsal identity	3	1	0.02406
cluster5	GO:0071456	cellular response to hypoxia	202	5	0.0242
cluster5	GO:0006168	adenine salvage	4	1	0.03195
cluster5	GO:0010376	stomatal complex formation	4	1	0.03195
cluster5	GO:0071398	cellular response to fatty acid	4	1	0.03195
cluster5	GO:0080143	regulation of amino acid export	4	1	0.03195
cluster5	GO:0000395	mRNA 5'-splice site recognition	4	1	0.03195
cluster5	GO:0046777	protein autophosphorylation	223	5	0.03494
cluster5	GO:0010235	guard mother cell cytokinesis	5	1	0.03978
cluster5	GO:0071284	cellular response to lead ion	5	1	0.03978
cluster5	GO:0044209	AMP salvage	5	1	0.03978
cluster5	GO:0043157	response to cation stress	5	1	0.03978
cluster5	GO:0042149	cellular response to glucose starvation	5	1	0.03978
cluster5	GO:0030643	cellular phosphate ion homeostasis	5	1	0.03978
cluster5	GO:1902806	regulation of cell cycle G1/S phase transition	6	1	0.04755
cluster5	GO:0061087	positive regulation of histone H3-K27 methylation	6	1	0.04755
cluster5	GO:0045116	protein neddylation	6	1	0.04755
cluster5	GO:1902347	response to strigolactone	6	1	0.04755
cluster5	GO:0010252	auxin homeostasis	44	2	0.04923
cluster6	GO:0009658	chloroplast organization	242	58	5.4e-14
cluster6	GO:0009409	response to cold	454	72	1.9e-12
cluster6	GO:0009768	photosynthesis, light harvesting in photosystem I	27	14	1.4e-09
cluster6	GO:0015995	chlorophyll biosynthetic process	66	21	1.9e-09
cluster6	GO:0009773	photosynthetic electron transport in photosystem I	18	11	8.2e-09
cluster6	GO:0048544	recognition of pollen	140	32	1e-08
cluster6	GO:0009644	response to high light intensity	74	22	2.3e-07
cluster6	GO:0010207	photosystem II assembly	32	14	3e-07
cluster6	GO:0009416	response to light stimulus	812	119	7.9e-07
cluster6	GO:0055114	oxidation-reduction process	727	97	2.1e-06
cluster6	GO:0010027	thylakoid membrane organization	63	16	1.2e-05
cluster6	GO:0071281	cellular response to iron ion	9	6	1.2e-05
cluster6	GO:0015979	photosynthesis	227	82	1.2e-05
cluster6	GO:0019252	starch biosynthetic process	39	12	1.7e-05
cluster6	GO:0007623	circadian rhythm	148	25	2.1e-05
cluster6	GO:0010422	regulation of brassinosteroid biosynthetic process	8	6	4.4e-05
cluster6	GO:0019253	reductive pentose-phosphate cycle	25	9	5.1e-05
cluster6	GO:0009645	response to low light intensity stimulus	17	9	5.9e-05
cluster6	GO:0009970	cellular response to sulfate starvation	11	6	6e-05
cluster6	GO:0098542	defense response to other organism	1354	78	9.8e-05
cluster6	GO:0010196	nonphotochemical quenching	22	8	0.00012
cluster6	GO:0045454	cell redox homeostasis	87	17	0.00023
cluster6	GO:1901259	chloroplast rRNA processing	19	7	0.0003
cluster6	GO:0006094	gluconeogenesis	45	11	0.00039
cluster6	GO:0042548	regulation of photosynthesis, light reaction	30	13	0.00042
cluster6	GO:0045038	protein import into chloroplast thylakoid membrane	6	4	0.00042
cluster6	GO:0042793	transcription from plastid promoter	11	6	0.00044
cluster6	GO:0009643	photosynthetic acclimation	10	5	0.00044
cluster6	GO:0006355	regulation of transcription, DNA-templated	1463	120	0.0005
cluster6	GO:0030388	fructose 1,6-bisphosphate metabolic process	21	7	0.00061
cluster6	GO:0005986	sucrose biosynthetic process	16	6	0.00075
cluster6	GO:0010239	chloroplast mRNA processing	11	5	0.00075
cluster6	GO:0009648	photoperiodism	140	16	0.00092
cluster6	GO:0010304	PSII associated light-harvesting complex II catabolic process	7	4	0.00093
cluster6	GO:0048564	photosystem I assembly	17	6	0.00108
cluster6	GO:0042372	phylloquinone biosynthetic process	12	5	0.00121
cluster6	GO:0071586	CAAX-box protein processing	12	5	0.00121
cluster6	GO:0071456	cellular response to hypoxia	202	28	0.00124
cluster6	GO:0016124	xanthophyll catabolic process	8	4	0.00175
cluster6	GO:0042550	photosystem I stabilization	8	4	0.00175
cluster6	GO:0042549	photosystem II stabilization	8	4	0.00175
cluster6	GO:0016121	carotene catabolic process	13	5	0.00185
cluster6	GO:0006000	fructose metabolic process	13	5	0.00185
cluster6	GO:0010190	cytochrome b6f complex assembly	9	4	0.00296
cluster6	GO:0070413	trehalose metabolism in response to stress	9	4	0.00296
cluster6	GO:0006419	alanyl-tRNA aminoacylation	5	3	0.00379
cluster6	GO:0005992	trehalose biosynthetic process	15	5	0.0038
cluster6	GO:2001141	regulation of RNA biosynthetic process	1465	122	0.00557
cluster6	GO:0080058	protein deglutathionylation	2	2	0.00566
cluster6	GO:0009662	etioplast organization	2	2	0.00566
cluster6	GO:0009767	photosynthetic electron transport chain	62	22	0.0066
cluster6	GO:0071482	cellular response to light stimulus	111	17	0.00676
cluster6	GO:0035304	regulation of protein dephosphorylation	33	8	0.00682
cluster6	GO:0010206	photosystem II repair	11	4	0.00687
cluster6	GO:0080163	regulation of protein serine/threonine phosphatase activity	11	4	0.00687
cluster6	GO:0048440	carpel development	63	6	0.0069
cluster6	GO:0006002	fructose 6-phosphate metabolic process	17	5	0.00691
cluster6	GO:0010244	response to low fluence blue light stimulus by blue low-fluence system	6	3	0.00716
cluster6	GO:0009234	menaquinone biosynthetic process	6	3	0.00716
cluster6	GO:0009813	flavonoid biosynthetic process	93	9	0.00751
cluster6	GO:0016036	cellular response to phosphate starvation	73	12	0.00797
cluster6	GO:0008219	cell death	246	20	0.00867
cluster6	GO:0032502	developmental process	3060	205	0.0089
cluster6	GO:0019375	galactolipid biosynthetic process	12	4	0.00969
cluster6	GO:0015976	carbon utilization	9	4	0.01181
cluster6	GO:0016123	xanthophyll biosynthetic process	7	3	0.01183
cluster6	GO:0006400	tRNA modification	76	10	0.01349
cluster6	GO:0009902	chloroplast relocation	19	5	0.0161
cluster6	GO:1902265	abscisic acid homeostasis	3	2	0.01614
cluster6	GO:0010617	circadian regulation of calcium ion oscillation	3	2	0.01614
cluster6	GO:0071836	nectar secretion	3	2	0.01614
cluster6	GO:0031425	chloroplast RNA processing	32	10	0.01745
cluster6	GO:0000160	phosphorelay signal transduction system	109	10	0.01776
cluster6	GO:0034051	negative regulation of plant-type hypersensitive response	8	3	0.01789
cluster6	GO:0009854	oxidative photosynthetic carbon pathway	8	3	0.01789
cluster6	GO:0010021	amylopectin biosynthetic process	8	3	0.01789
cluster6	GO:0019464	glycine decarboxylation via glycine cleavage system	8	3	0.01789
cluster6	GO:0016117	carotenoid biosynthetic process	37	9	0.02218
cluster6	GO:0010205	photoinhibition	15	4	0.02231
cluster6	GO:0010150	leaf senescence	157	17	0.02409
cluster6	GO:0019264	glycine biosynthetic process from serine	9	3	0.02535
cluster6	GO:0010161	red light signaling pathway	9	3	0.02535
cluster6	GO:0009769	photosynthesis, light harvesting in photosystem II	9	3	0.02535
cluster6	GO:0005978	glycogen biosynthetic process	9	3	0.02535
cluster6	GO:0009052	pentose-phosphate shunt, non-oxidative branch	9	3	0.02535
cluster6	GO:0006565	L-serine catabolic process	9	3	0.02535
cluster6	GO:0042744	hydrogen peroxide catabolic process	31	6	0.02602
cluster6	GO:0042542	response to hydrogen peroxide	58	9	0.02842
cluster6	GO:0006995	cellular response to nitrogen starvation	32	6	0.03005
cluster6	GO:0016554	cytidine to uridine editing	32	6	0.03005
cluster6	GO:1903426	regulation of reactive oxygen species biosynthetic process	12	4	0.03061
cluster6	GO:0042908	xenobiotic transport	4	2	0.03067
cluster6	GO:1903862	positive regulation of oxidative phosphorylation	4	2	0.03067
cluster6	GO:0010136	ureide catabolic process	4	2	0.03067
cluster6	GO:0010270	photosystem II oxygen evolving complex assembly	4	2	0.03067
cluster6	GO:1901332	negative regulation of lateral root development	4	2	0.03067
cluster6	GO:0019447	D-cysteine catabolic process	4	2	0.03067
cluster6	GO:0060178	regulation of exocyst localization	4	2	0.03067
cluster6	GO:0000725	recombinational repair	117	6	0.03088
cluster6	GO:0018026	peptidyl-lysine monomethylation	10	3	0.03422
cluster6	GO:0032544	plastid translation	17	4	0.0345
cluster6	GO:0060918	auxin transport	140	6	0.03469
cluster6	GO:0009735	response to cytokinin	91	12	0.03983
cluster6	GO:0030187	melatonin biosynthetic process	18	4	0.04179
cluster6	GO:0009649	entrainment of circadian clock	16	5	0.04434
cluster6	GO:0045493	xylan catabolic process	11	3	0.04448
cluster6	GO:0046655	folic acid metabolic process	11	3	0.04448
cluster6	GO:0010019	chloroplast-nucleus signaling pathway	11	3	0.04448
cluster6	GO:0009687	abscisic acid metabolic process	33	6	0.04846
cluster6	GO:1990170	stress response to cadmium ion	6	3	0.04853
cluster6	GO:0015938	coenzyme A catabolic process	5	2	0.04859
cluster6	GO:0033542	fatty acid beta-oxidation, unsaturated, even number	5	2	0.04859
cluster6	GO:0006145	purine nucleobase catabolic process	5	2	0.04859
cluster6	GO:0006104	succinyl-CoA metabolic process	5	2	0.04859
cluster6	GO:0001578	microtubule bundle formation	5	2	0.04859
cluster6	GO:0071284	cellular response to lead ion	5	2	0.04859
cluster6	GO:0043153	entrainment of circadian clock by photoperiod	5	2	0.04859
cluster6	GO:0010218	response to far red light	45	7	0.04956
