# Supplementary material for: Comparative Transcriptome Analysis Identifies Key Defense Genes and Mechanisms in Mulberry (Morus alba) Leaves against Silkworms (Bombyx mori)
Source: Int J Mol Sci. 2022 Nov 4;23(21):13519. doi: 10.3390/ijms232113519 (PMC9656888; doi:10.3390/ijms232113519)
Supplement: Supplementary file 1 [file ijms-23-13519-s001.zip › Table S5.xlsx]

## Sheet: Sheet1
Table S5. The MapMan pathways enriched by the DEGs.
bin	name	elements	p-value
29.2	protein.synthesis	117	0
29.2.1	protein.synthesis.ribosomal protein	104	0
29.2.1.2	protein.synthesis.ribosomal protein.eukaryotic	87	0
29.2.1.2.1	protein.synthesis.ribosomal protein.eukaryotic.40S subunit	35	0
29.2.1.2.2	protein.synthesis.ribosomal protein.eukaryotic.60S subunit	52	0
17.7	hormone metabolism.jasmonate	9	0.00130262
17.7.1	hormone metabolism.jasmonate.synthesis-degradation	9	0.00130262
29.2.1.1.1	protein.synthesis.ribosomal protein.prokaryotic.chloroplast	12	0.00135054
9.9	mitochondrial electron transport / ATP synthesis.F1-ATPase	7	0.00146905
29.2.1.1	protein.synthesis.ribosomal protein.prokaryotic	16	0.00182424
18	Co-factor and vitamine metabolism	18	0.00248655
27.3.3	RNA.regulation of transcription.AP2/EREBP, APETALA2/Ethylene-responsive element binding protein family	23	0.00266679
2.1	major CHO metabolism.synthesis	13	0.00277311
16.1	secondary metabolism.isoprenoids	33	0.0029032
16.1.2	secondary metabolism.isoprenoids.mevalonate pathway	6	0.0030966
10.6.3	cell wall.degradation.pectate lyases and polygalacturonases	11	0.00318031
10.6	cell wall.degradation	21	0.00387859
27.3	RNA.regulation of transcription	264	0.00415624
26.12	misc.peroxidases	8	0.00438675
1.1.2.1	PS.lightreaction.photosystem I.LHC-I	5	0.00494579
2	major CHO metabolism	32	0.0050464
16.2.1	secondary metabolism.phenylpropanoids.lignin biosynthesis	11	0.0052038
34.16	transport.ABC transporters and multidrug resistance systems	18	0.00545952
23.4.10	nucleotide metabolism.phosphotransfer and pyrophosphatases.nucleoside diphosphate kinase	3	0.00576325
34	transport	152	0.00584635
10.1	cell wall.precursor synthesis	9	0.00586186
1.1.2.2	PS.lightreaction.photosystem I.PSI polypeptide subunits	7	0.00619872
35.1.5	not assigned.no ontology.pentatricopeptide (PPR) repeat-containing protein	23	0.00620875
27.3.99	RNA.regulation of transcription.unclassified	32	0.0063139
35.1	not assigned.no ontology	230	0.00751934
1.3	PS.calvin cyle	16	0.00769412
29.5.11.4	protein.degradation.ubiquitin.E3	66	0.00818937
27.3.11	RNA.regulation of transcription.C2H2 zinc finger family	14	0.00904094
30.2.8	signalling.receptor kinases	9	0.00941344
20.1	stress.biotic	56	0.00947741
1.2	PS.photorespiration	6	0.00984141
26	misc	208	0.0100946
10.8	cell wall.pectin*esterases	9	0.0124959
2.1.2	major CHO metabolism.synthesis.starch	10	0.0133999
27.3.20	RNA.regulation of transcription.G2-like transcription factor family, GARP	7	0.0138073
29.2.1.1.1.1	protein.synthesis.ribosomal protein.prokaryotic.chloroplast.30S subunit	7	0.0146803
23.4	nucleotide metabolism.phosphotransfer and pyrophosphatases	8	0.0151468
20	stress	134	0.0158746
11.9.2	lipid metabolism.lipid degradation.lipases	15	0.0185782
17.2.1	hormone metabolism.auxin.synthesis-degradation	2	0.0187441
17.2.3	hormone metabolism.auxin.induced-regulated-responsive-activated	21	0.0187552
16.8.3	secondary metabolism.flavonoids.dihydroflavonols	4	0.0190128
21.5	redox.peroxiredoxin	2	0.0207039
21.5.1	redox.peroxiredoxin.BAS1	2	0.0207039
10.5.1	cell wall.cell wall proteins.AGPs	6	0.0209275
3.1.1	minor CHO metabolism.raffinose family.galactinol synthases	3	0.0212526
16.10	secondary metabolism.simple phenols	4	0.0214826
29.2.1.2.2.17	protein.synthesis.ribosomal protein.eukaryotic.60S subunit.L17	2	0.0221543
21.6	redox.dismutases and catalases	3	0.0224962
2.1.2.3	major CHO metabolism.synthesis.starch.starch branching	3	0.0228657
29.2.1.2.2.9	protein.synthesis.ribosomal protein.eukaryotic.60S subunit.L9	2	0.0229361
13.1.1.3	amino acid metabolism.synthesis.central amino acid metabolism.alanine	3	0.0230821
27.4	RNA.RNA binding	18	0.0233602
29.2.1.2.1.8	protein.synthesis.ribosomal protein.eukaryotic.40S subunit.S8	2	0.0237665
27.3.67	RNA.regulation of transcription.putative transcription regulator	16	0.0239578
27.3.25	RNA.regulation of transcription.MYB domain transcription factor family	21	0.0248723
10.2	cell wall.cellulose synthesis	14	0.0249031
31	cell	91	0.0251468
27.3.27	RNA.regulation of transcription.NAC domain transcription factor family	4	0.0254668
29.2.1.2.1.9	protein.synthesis.ribosomal protein.eukaryotic.40S subunit.S9	2	0.0258507
29.2.1.2.1.14	protein.synthesis.ribosomal protein.eukaryotic.40S subunit.S14	2	0.0259576
26.2	misc.UDP glucosyl and glucoronyl transferases	44	0.0261687
29.2.1.2.2.12	protein.synthesis.ribosomal protein.eukaryotic.60S subunit.L12	2	0.0265797
29.2.1.2.2.3	protein.synthesis.ribosomal protein.eukaryotic.60S subunit.L3	2	0.0269646
19.10	tetrapyrrole synthesis.magnesium chelatase	3	0.0270186
29.2.1.2.1.15	protein.synthesis.ribosomal protein.eukaryotic.40S subunit.S15	2	0.0272984
11.9.3	lipid metabolism.lipid degradation.lysophospholipases	6	0.0274412
29.2.1.2.1.2	protein.synthesis.ribosomal protein.eukaryotic.40S subunit.S2	2	0.0279767
27.3.41	RNA.regulation of transcription.B3 transcription factor family	3	0.0281005
29.2.1.2.1.25	protein.synthesis.ribosomal protein.eukaryotic.40S subunit.S25	2	0.0282635
29.2.1.2.1.27	protein.synthesis.ribosomal protein.eukaryotic.40S subunit.S27	2	0.028379
29.2.1.2.2.513	protein.synthesis.ribosomal protein.eukaryotic.60S subunit.L13A	2	0.0291098
31.1	cell.organisation	51	0.0299078
29.2.1.2.2.21	protein.synthesis.ribosomal protein.eukaryotic.60S subunit.L21	2	0.0299172
29.2.1.2.2.35	protein.synthesis.ribosomal protein.eukaryotic.60S subunit.L35	2	0.0301297
29.2.1.2.1.7	protein.synthesis.ribosomal protein.eukaryotic.40S subunit.S7	2	0.0305585
29.2.1.2.2.14	protein.synthesis.ribosomal protein.eukaryotic.60S subunit.L14	2	0.0314002
30	signalling	206	0.0317394
29.2.1.2.2.31	protein.synthesis.ribosomal protein.eukaryotic.60S subunit.L31	2	0.0317488
16.8	secondary metabolism.flavonoids	22	0.0319495
11.9.3.2	lipid metabolism.lipid degradation.lysophospholipases.carboxylesterase	2	0.0324236
4.1.14	glycolysis.cytosolic branch.enolase	2	0.032521
19.14	tetrapyrrole synthesis.protochlorophyllide reductase	2	0.0326186
29.2.1.2.2.26	protein.synthesis.ribosomal protein.eukaryotic.60S subunit.L26	2	0.0327492
27.3.26	RNA.regulation of transcription.MYB-related transcription factor family	9	0.0337643
1.3.13	PS.calvin cyle.rubisco interacting	4	0.0339261
29.2.1.2.2.82	protein.synthesis.ribosomal protein.eukaryotic.60S subunit.P2	2	0.0340121
13.1.6	amino acid metabolism.synthesis.aromatic aa	10	0.0349802
3.1.1.2	minor CHO metabolism.raffinose family.galactinol synthases.putative	2	0.0356667
11.9.2.1	lipid metabolism.lipid degradation.lipases.triacylglycerol lipase	11	0.0366827
34.99	transport.misc	20	0.0373321
1.1.1.1	PS.lightreaction.photosystem II.LHC-II	6	0.0377784
29.2.1.1.1.2	protein.synthesis.ribosomal protein.prokaryotic.chloroplast.50S subunit	5	0.0381543
21.2.2	redox.ascorbate and glutathione.glutathione	2	0.0385769
27.3.12	RNA.regulation of transcription.C3H zinc finger family	3	0.0394448
13.1.1	amino acid metabolism.synthesis.central amino acid metabolism	4	0.0403787
9	mitochondrial electron transport / ATP synthesis	24	0.0425658
16.1.4	secondary metabolism.isoprenoids.carotenoids	9	0.0474702
6	gluconeogenese/ glyoxylate cycle	3	0.0479554
1.1.4	PS.lightreaction.ATP synthase	2	0.0481355
