# Supplementary material for: Comparative Transcriptome Analysis Identifies Key Defense Genes and Mechanisms in Mulberry (Morus alba) Leaves against Silkworms (Bombyx mori)
Source: Int J Mol Sci. 2022 Nov 4;23(21):13519. doi: 10.3390/ijms232113519 (PMC9656888; doi:10.3390/ijms232113519)
Supplement: Supplementary file 1 [file ijms-23-13519-s001.zip › Table S6.xlsx]

## Sheet: Sheet1
Table S6: The real-time quantitative PCR (qRT-PCR) primers sequences.
Unigene name	Primer information
Cluster-8107.13583	F	GAGGCTGCTGAGATGAACAAGAG
	R	CACAGGGCGATGTCAATGGTAAT
Cluster-8107.11923	F	GCTGATGTTCATTGTGCCTACTG
	R	GCGGTGGAAGGGATAGAAGAG
Cluster-8107.1566	F	TGGCGGCAGGACTCATAAGAA
	R	CCTTCTCGGCAGTGTTGTCTTC
Cluster-8107.2073	F	CCACTGATAGCAACCATCCTCTA
	R	AGGTCTCGCTCCAAAGAAATAGT
Cluster-8107.9620	F	ACACAGAGTTGGCGAAGGAGAT
	R	ACGGACTTCATCAGCGGCATT
Cluster-8107.23344	F	TGTATGGAGCCAGTGGAGAAGT
	R	CAGAGTTCCTTGCCGTTGAAGAA
Cluster-8107.14010	F	CCACCTTGCCTATCGTGATTGAA
	R	AGCCTACCTCAGAGACACACATAT
Cluster-8107.14617	F	GAACACTCCAAGCTCCAACTCA
	R	GCCCTCGTCTATGTCATCAACTT
Cluster-8107.9559	F	ATTAGCCTCAGCGGTCCTCAT
	R	AGATGGTGATTGGATGCTTGTAGG
Cluster-8107.12178	F	GCTCAGTAGTCCGCTCAGAAG
	R	AACCAGACAGAGCAGACCTTG
Cluster-8107.13660	F	ACAAGCCCATCCCTCTCGTATA
	R	CTTCTTTGCCTGTGTACCTCCAT
Cluster-8107.7599	F	CCAAATCCCTCCAAGCCATCAATA
	R	AGGAACAAGAACAGCCGTGAC
Cluster-8107.13035	F	TCTATGAGGTCACTGTGGATGTC
	R	CTGGCTATCTTCACTCCCTTCTT
